# Supplementary material for: Recyclable imidazolium ion-tagged nickel catalyst for microwave-assisted C–S cross-coupling in water using sulfonyl hydrazide as the sulfur source
Source: Royal Society of Chemistry journal article supplement (doi:10.1039/c8nj00904j), 2018-01-01

## Supplementary Information

### Recyclable Imidazolium Ion tagged Nickel Catalyst for Microwave Assisted C-S Cross-Coupling in Water using Sulfonyl hydrazide as a Sulfur Source

Vaishali Saini, Bharti Khungar\*

Department of Chemistry

Birla Institute of Technology and Science Pilani

Pilani Campus, Vidya Vihar, Pilani, 333 031, India

E-mail: [bkhungar@pilani.bits-pilani.ac.in](mailto:bkhungar@pilani.bits-pilani.ac.in)

#### Contents:

1. IR spectra of **2** and **3**
2. UV spectra of **2** and **3**
3. <sup>1</sup>H and <sup>13</sup>C NMR analysis of **2** and **3**
4. HRMS of **2** and **3**
5. <sup>1</sup>H NMR and <sup>13</sup>C NMR spectral data of products
6. Mass spectra of *in situ* generated species for C-S cross coupling reaction
7. References
8. <sup>1</sup>H NMR and <sup>13</sup>C NMR spectra of products

## 1. IR spectra of 2 and 3

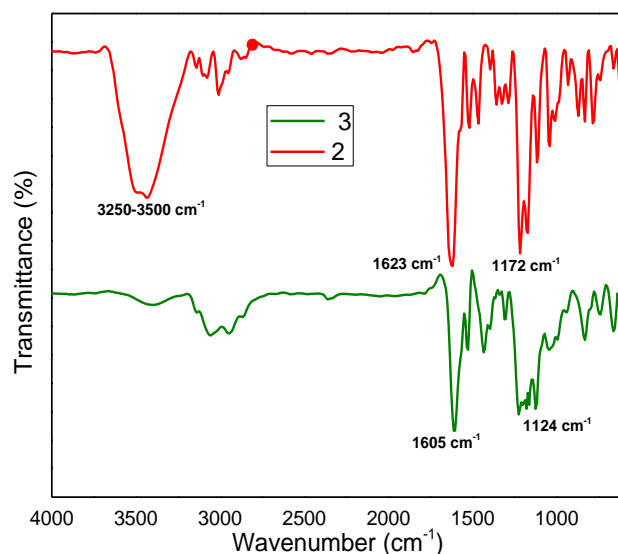

Fig. S1 IR Spectra of 2 and 3

## 2. UV spectra of 2 and 3

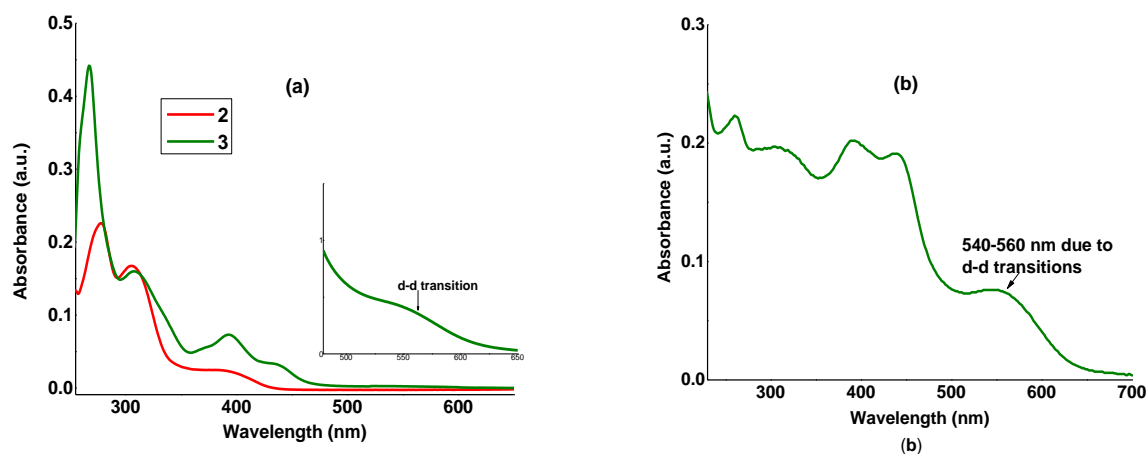

Fig. S2 UV-visible spectra (a) 2 and 3 in solvent (b) 3 in solid state

## 3. <sup>1</sup>H and <sup>13</sup>C NMR analysis of 2 and 3

**Compound 2** Bright yellow solid; Yield: 92%; mp 130-135 °C;

<sup>1</sup>H NMR (400 MHz, DMSO)  $\delta$  13.79 (s, 2H), 9.22 (s, 2H), 8.45 (s, 2H), 7.83 (s, 2H), 7.74 (s, 2H), 7.27 (d,  $J = 8.6$  Hz, 2H), 6.35 (d,  $J = 2.3$  Hz, 2H), 6.33 (d,  $J = 2.3$  Hz, 2H), 6.29 (d,  $J = 2.2$  Hz, 2H), 4.35 (t,  $J = 6.8$  Hz, 4H), 4.03 (t,  $J = 5.9$  Hz, 4H), 3.85 (s, 6H), 3.83 (s, 4H), 2.33 – 2.20 (m, 4H). <sup>13</sup>C NMR (100 MHz, DMSO-d<sub>6</sub>)  $\delta$  166.1, 163.2, 161.8, 137.2, 134.3, 124.0, 122.9, 115.3, 105.5, 102.4, 64.9, 58.3, 46.9, 36.3, 29.4.

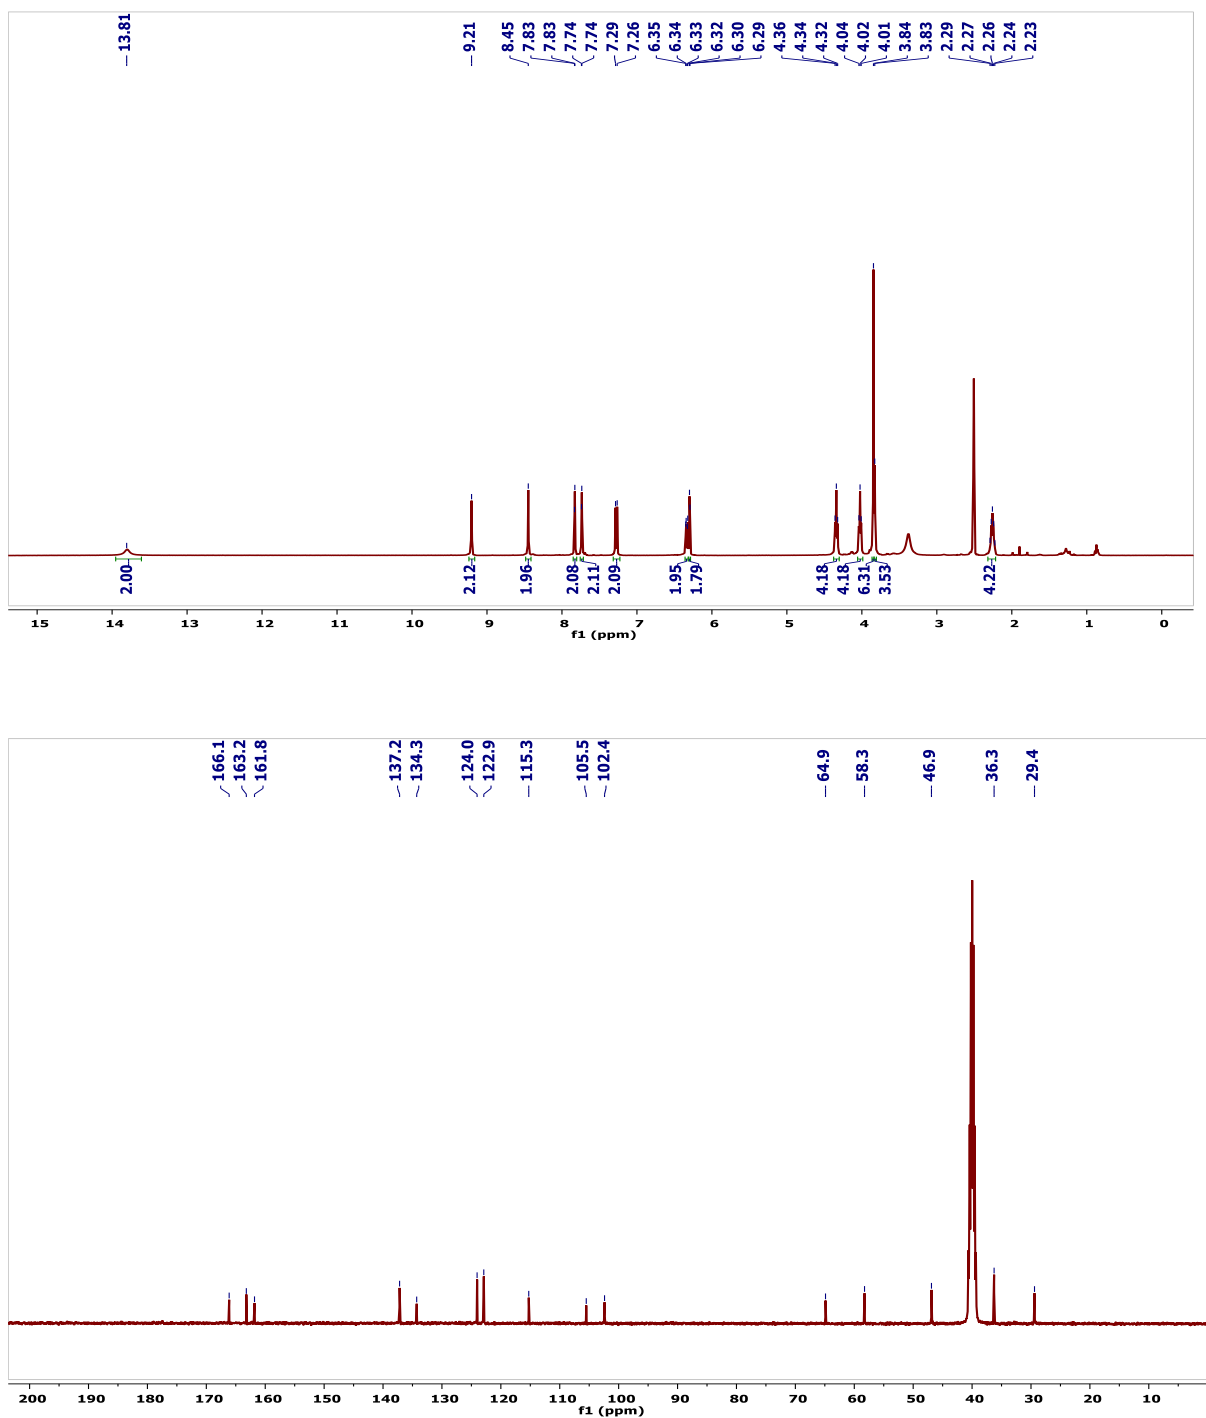

**Fig. S3** <sup>1</sup>H and <sup>13</sup>C NMR Spectra of **2**

**Compound 3** Brown solid; Yield: 95%; mp 210-215 °C;

<sup>1</sup>H NMR (400 MHz, DMSO-*d*<sub>6</sub>) δ 9.19 (s, 2H), 7.81 (s, 2H), 7.73 (d, *J* = 7.9 Hz, 4H), 7.16 (d, *J* = 8.7 Hz, 2H), 6.16 (s, 2H), 6.10 (d, *J* = 8.6 Hz, 2H), 4.34 (t, *J* = 6.9 Hz, 4H), 3.97 (t, *J* = 6.0 Hz, 4H), 3.85 (s, 6H), 3.33 (s, 4H), 2.41 – 2.16 (m, 4H), <sup>13</sup>C NMR (100 MHz, DMSO-*d*<sub>6</sub>) δ 166.3, 165.8, 162.6, 137.2, 133.7, 124.0, 122.9, 112.6, 106.5, 102.0, 65.1, 57.6, 46.8, 36.2, 29.4.

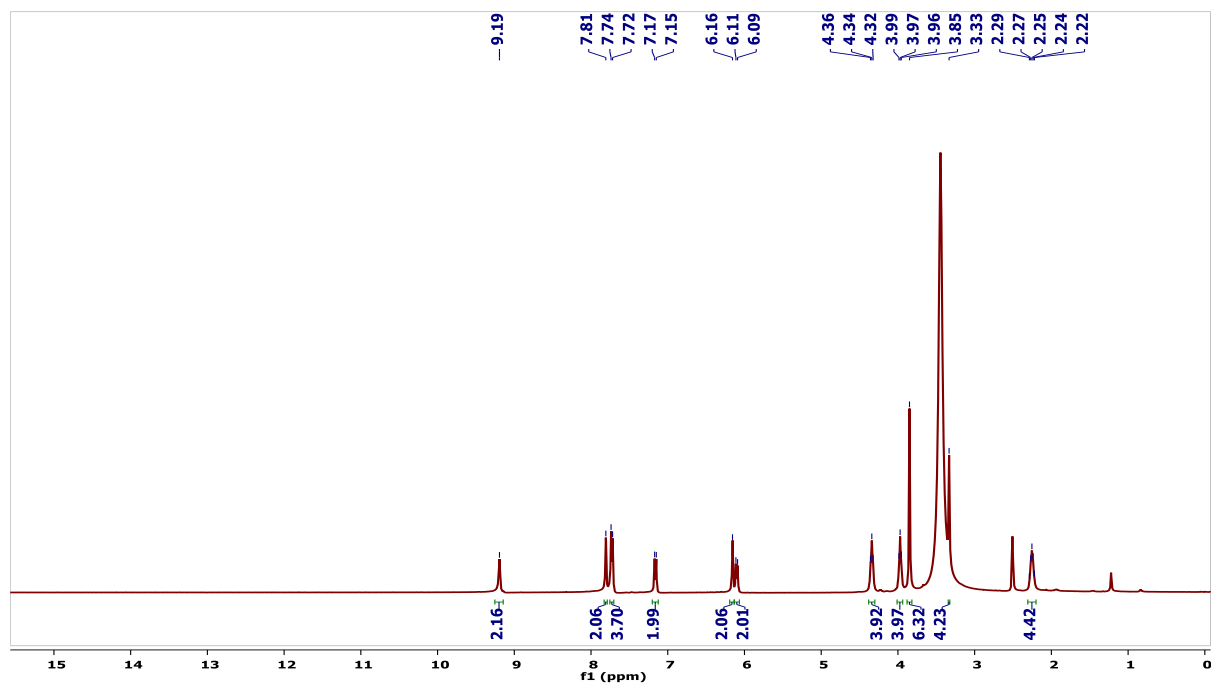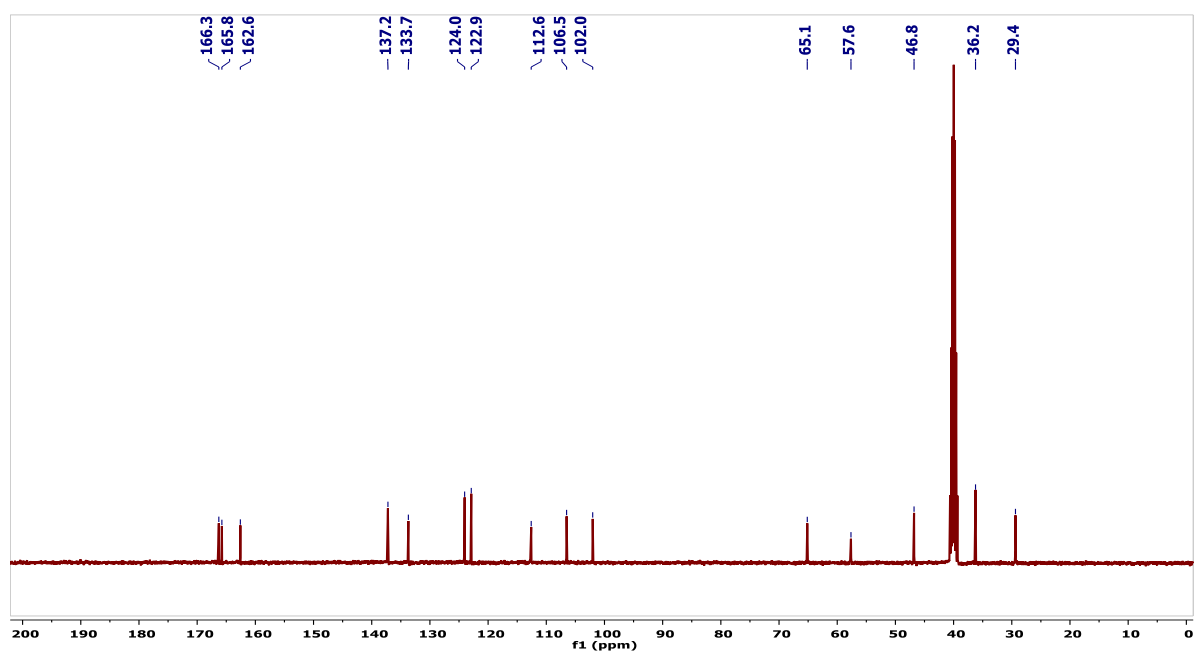

Fig. S4  $^1\text{H}$  and  $^{13}\text{C}$  NMR Spectra of **3**

#### 4. HRMS of 2 and 3

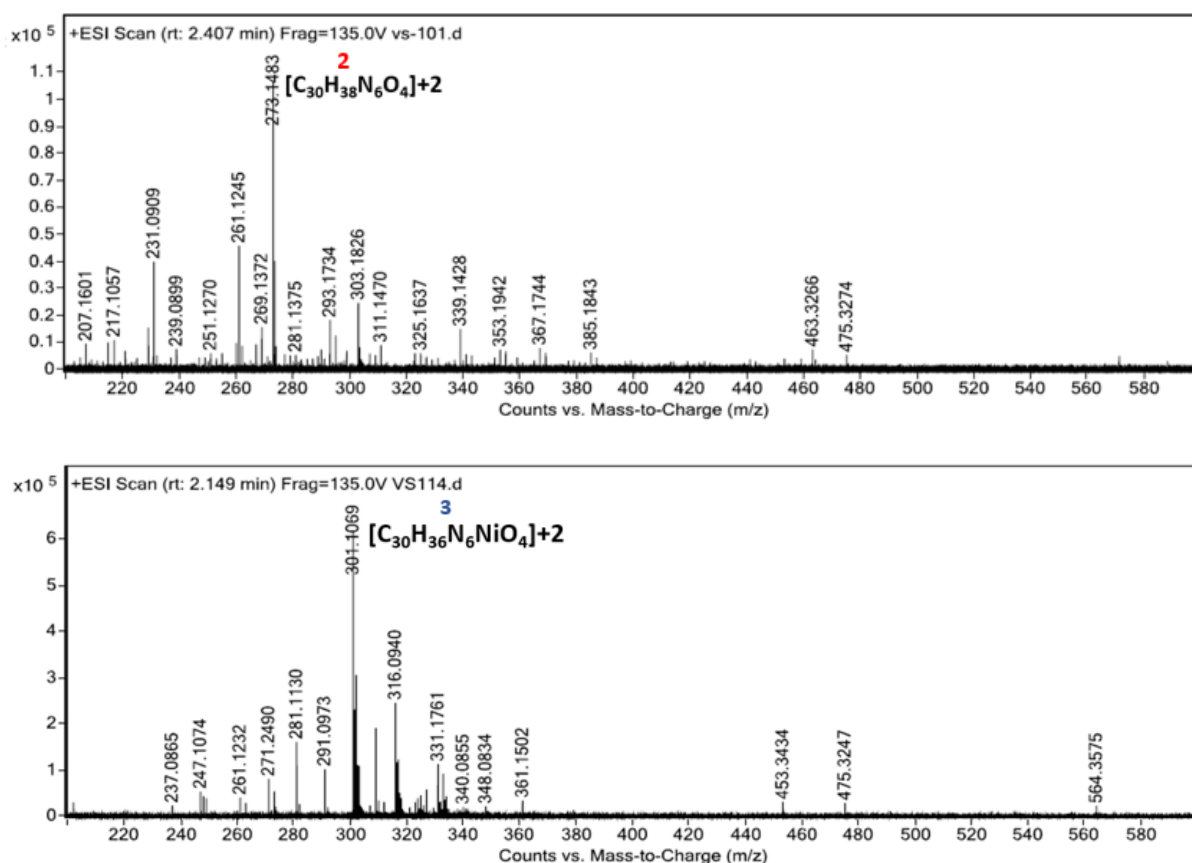

Fig. S5 HRMS of 2 and 3

#### 5. $^1H$ NMR and $^{13}C$ NMR Spectral data

##### 1. Diphenylsulfane (6a)<sup>1</sup>

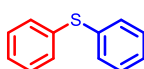

Colorless oil;  $^1H$  NMR (400 MHz,  $CDCl_3$ )  $\delta$  7.40 – 7.25 (m, 10H).  $^{13}C$  NMR (100 MHz,  $CDCl_3$ )  $\delta$  135.8, 131.1, 129.2, 127.0.

##### 2. Phenyl(*p*-tolyl)sulfane (6b and 6b')<sup>2</sup>

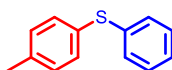

Colorless oil;  $^1H$  NMR (400 MHz,  $CDCl_3$ )  $\delta$  7.34 (d,  $J = 1.9$  Hz, 1H), 7.32 (d,  $J = 1.8$  Hz, 2H), 7.30 (s, 2H), 7.24 – 7.21 (m, 1H), 7.19 – 7.15 (m, 3H), 2.37 (s, 3H).  $^{13}C$  NMR (100 MHz,  $CDCl_3$ )  $\delta$  137.6, 137.1, 132.3, 131.3, 130.1, 129.8, 129.0, 126.4, 21.2.

##### 3. (4-Methoxyphenyl)(phenyl)sulfane (6c)<sup>1</sup>

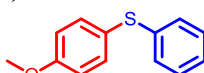

Colorless oil;  $^1H$  NMR (400 MHz,  $CDCl_3$ )  $\delta$  7.44 (d,  $J = 8.8$  Hz, 2H), 7.27 – 7.15 (m, 5H), 6.93 (d,  $J = 8.8$  Hz, 2H), (3.85 Hz, 3H).  $^{13}C$  NMR (100 MHz,  $CDCl_3$ )  $\delta$  159.8, 138.6, 135.4, 128.9, 128.2, 125.8, 124.3, 115.0, 55.4.

#### 4. (4-Nitrophenyl)(phenyl)sulfane (6d and 6d')<sup>1</sup>

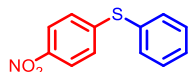

Yellow solid; <sup>1</sup>H NMR (400 MHz, CDCl<sub>3</sub>) δ 8.09 (d, *J* = 9.1 Hz, 2H), 7.58-7.58 (m, 2.6 Hz, 2H), 7.50-7.47 (m, 2H), 7.20 (d, *J* = 9.1 Hz, 3H). <sup>13</sup>C NMR (100 MHz, CDCl<sub>3</sub>) δ 148.5, 145.5, 134.8, 130.5, 130.1, 129.7, 126.7, 124.1.

#### 5. 2-Nitrophenyl phenyl sulfane (6e)<sup>3</sup>

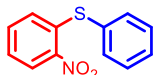

Yellow solid; <sup>1</sup>H NMR (400 MHz, CDCl<sub>3</sub>) δ 8.25 (dd, *J* = 8.3, 1.4 Hz, 1H), 7.63 – 7.59 (m, 2H), 7.53 – 7.50 (m, 3H), 7.36 (d, *J* = 2.5 Hz, 1H), 7.28 – 7.19 (m, 1H), 6.88 (dd, *J* = 8.2, 1.2 Hz, 1H). <sup>13</sup>C NMR (100 MHz, CDCl<sub>3</sub>) δ 144.0, 139.5, 135.9, 133.4, 131.0, 130.1, 130.0, 128.3, 125.8, 124.9.

#### 6. (4-Chlorophenyl)(phenyl)sulfane (6f)<sup>2</sup>

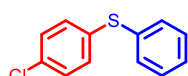

White solid; <sup>1</sup>H NMR (400 MHz, CDCl<sub>3</sub>) 7.38–7.25 (m, 9H); <sup>13</sup>C NMR (100 MHz, CDCl<sub>3</sub>); δ 135.1, 134.7, 133.0, 132.0, 131.3, 129.3, 127.4.

#### 7. Di-(*p*-tolyl)sulfane (6g)<sup>1</sup>

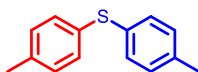

White solid; <sup>1</sup>H NMR (400 MHz, CDCl<sub>3</sub>) δ 7.25 (d, *J* = 7.9 Hz, 4H), 7.12 (d, *J* = 7.9 Hz, 4H), 2.35 (s, 6H). <sup>13</sup>C NMR (100 MHz, CDCl<sub>3</sub>) δ 136.9, 132.7, 131.1, 129.9, 21.1.

#### 8. (4-Methoxyphenyl)(*p*-tolyl)sulfane (6h)<sup>1</sup>

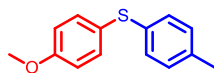

Colorless oil; <sup>1</sup>H NMR (400 MHz, DMSO) δ 7.35 (d, *J* = 8.8 Hz, 2H), 7.16 – 7.07 (m, 4H), 6.98 (d, *J* = 8.8 Hz, 2H), 3.77 (s, 3H), 2.26 (s, 3H). <sup>13</sup>C NMR (100 MHz, DMSO) δ 159.8, 136.4, 134.7, 134.1, 130.4, 129.4, 124.8, 115.7, 55.7, 21.0.

#### 9. (4-Nitrophenyl)(*p*-tolyl)sulfane (6i and 6i')<sup>1</sup>

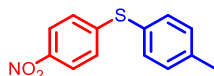

Light yellow solid; <sup>1</sup>H NMR (400 MHz, CDCl<sub>3</sub>) δ 8.07 (d, *J* = 9.1 Hz, 2H), 7.46 (d, *J* = 8.2 Hz, 2H), 7.30 (d, *J* = 8.8 Hz, 2H), 7.15 (d, *J* = 8.9 Hz, 2H), 2.44 (s, 3H). <sup>13</sup>C NMR (100 MHz, CDCl<sub>3</sub>) δ 149.4, 145.1, 140.3, 135.1, 130.9, 126.5, 126.1, 124.0, 21.4.

#### 10. (4-Chlorophenyl)(*p*-tolyl)sulfane (6j)<sup>4</sup>

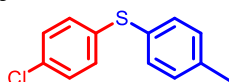

Colorless oil; <sup>1</sup>H NMR (400 MHz, CDCl<sub>3</sub>) δ 7.34 – 7.29 (m, 4H), 7.21 – 7.16 (m, 4H), 2.38 (s, 3H). <sup>13</sup>C NMR (100 MHz, CDCl<sub>3</sub>) δ 138.1, 136.0, 132.5, 132.3, 130.8, 130.2, 129.5, 129.1, 21.2.

#### 11. Benzyl(phenyl)sulfane (6k)<sup>1</sup>

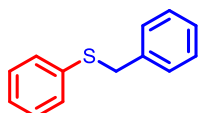

Colorless oil;  $^1\text{H}$  NMR (400 MHz,  $\text{CDCl}_3$ )  $\delta$  7.36 – 7.19 (m, 10H), 4.15 (s, 2H);  $^{13}\text{C}$  NMR (100 MHz,  $\text{CDCl}_3$ )  $\delta$  137.5, 136.4, 129.8, 128.9, 128.5, 127.2, 126.4, 39.1.

**12. Benzyl(4-nitrophenyl)sulfane (6l)<sup>4</sup>**

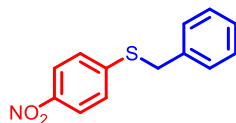

Yellow solid;  $^1\text{H}$  NMR (400 MHz,  $\text{CDCl}_3$ )  $\delta$  8.13 (d,  $J$  = 9.0 Hz, 2H), 7.44 – 7.30 (m, 7H), 4.28 (s, 2H);  $^{13}\text{C}$  NMR (100 MHz,  $\text{CDCl}_3$ )  $\delta$  147.2, 145.2, 135.4, 128.9, 128.7, 127.8, 126.6, 123.9, 37.0.

**13. (4-(tert-butyl)phenyl)(phenyl)sulfane (6m)<sup>2</sup>**

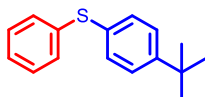

Colorless oil;  $^1\text{H}$  NMR (400 MHz,  $\text{CDCl}_3$ )  $\delta$  7.35–7.25 (m, 9H), 1.31 (s, 9H);  $^{13}\text{C}$  NMR (100 MHz,  $\text{CDCl}_3$ )  $\delta$  150.6, 136.7, 131.5, 131.1, 130.3, 129.1, 126.6, 126.3, 34.6, 31.3.

**14. (4-(tert-Butyl)phenyl)(4-methoxyphenyl)sulfane (6n)<sup>1</sup>**

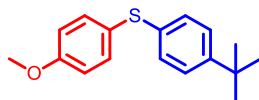

Colorless oil;  $^1\text{H}$  NMR (400 MHz,  $\text{CDCl}_3$ )  $\delta$  7.43 (d,  $J$  = 8.9 Hz, 2H), 7.31 (d,  $J$  = 8.6 Hz, 2H), 7.17 (d,  $J$  = 8.6 Hz, 2H), 6.92 (d,  $J$  = 8.8 Hz, 2H), 3.84 (s, 3H), 1.32 (s, 9H).  $^{13}\text{C}$  NMR (100 MHz,  $\text{CDCl}_3$ )  $\delta$  159.6, 149.2, 134.8, 134.7, 128.6, 126.0, 125.1, 114.9, 55.4, 34.4, 31.3.

**15. Naphthalen-2-yl(phenyl)sulfane (6o)<sup>2</sup>**

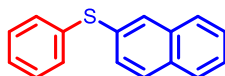

White solid;  $^1\text{H}$  NMR (400 MHz,  $\text{CDCl}_3$ )  $\delta$  7.86 (d,  $J$  = 1.4 Hz, 1H), 7.85 – 7.74 (m, 3H), 7.53 – 7.29 (m, 8H);  $^{13}\text{C}$  NMR (100 MHz,  $\text{CDCl}_3$ )  $\delta$  135.8, 133.8, 133.0, 132.3, 131.0, 129.9, 129.2, 128.9, 128.8, 127.7, 127.4, 127.1, 126.6, 126.2.

**16. Naphthalen-2-yl(p-tolyl)sulfane (6p)<sup>4</sup>**

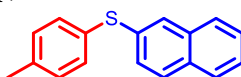

White solid;  $^1\text{H}$  NMR (400 MHz,  $\text{CDCl}_3$ )  $\delta$  7.80 – 7.67 (m, 3H), 7.62 (s, 1H), 7.50 – 7.42 (m, 4H), 7.32 (dd,  $J$  = 8.6, 1.9 Hz, 1H), 6.94 (d,  $J$  = 8.9 Hz, 2H), 3.86 (s, 3H).  $^{13}\text{C}$  NMR (100 MHz,  $\text{CDCl}_3$ )  $\delta$  159.8, 135.9, 135.2, 133.8, 131.7, 128.5, 127.7, 127.1, 126.7, 126.5, 126.5, 125.6, 124.4, 115.0, 55.4.

**17. (4-methoxyphenyl)(naphthalen-2-yl)sulfane (6q)<sup>2</sup>**

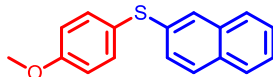

White solid;  $^1\text{H}$  NMR (400 MHz,  $\text{CDCl}_3$ )  $\delta$  7.80 – 7.71 (m, 4H), 7.47 – 7.35 (m, 5H), 7.19 (d,  $J$  = 7.9 Hz, 2H), 2.39 (s, 3H).  $^{13}\text{C}$  NMR (100 MHz,  $\text{CDCl}_3$ )  $\delta$  137.6, 134.3, 133.8, 132.1, 130.1, 128.7, 128.4, 127.9, 127.7, 127.3, 126.5, 125.9, 21.2.

**18. 4-methylbenzenesulfonylthioic acid S-(4-methylphenyl) ester (8)<sup>5</sup>**

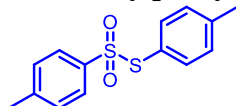

White solid;  $^1\text{H}$  NMR (400 MHz,  $\text{CDCl}_3$ )  $\delta$  7.48 (d,  $J = 8.3$  Hz, 2H), 7.28 – 7.21 (t, 4H), 7.16 (d,  $J = 8.0$  Hz, 2H), 2.44 (s, 3H), 2.40 (s, 3H).  $^{13}\text{C}$  NMR (100 MHz,  $\text{CDCl}_3$ )  $\delta$  144.6, 142.1, 140.4, 136.5, 130.2, 129.4, 127.6, 124.6, 21.7, 21.5.

## 6. Mass spectra of *in situ* generated species for C-S cross coupling reaction

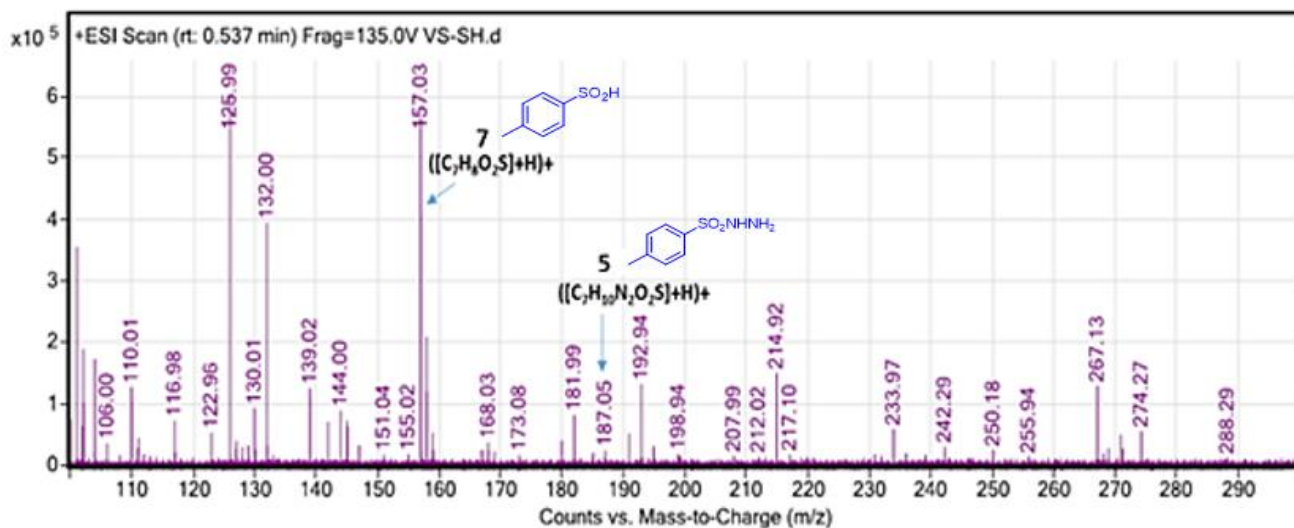

Fig. S6 Mass spectra of reaction mixture (step 1)

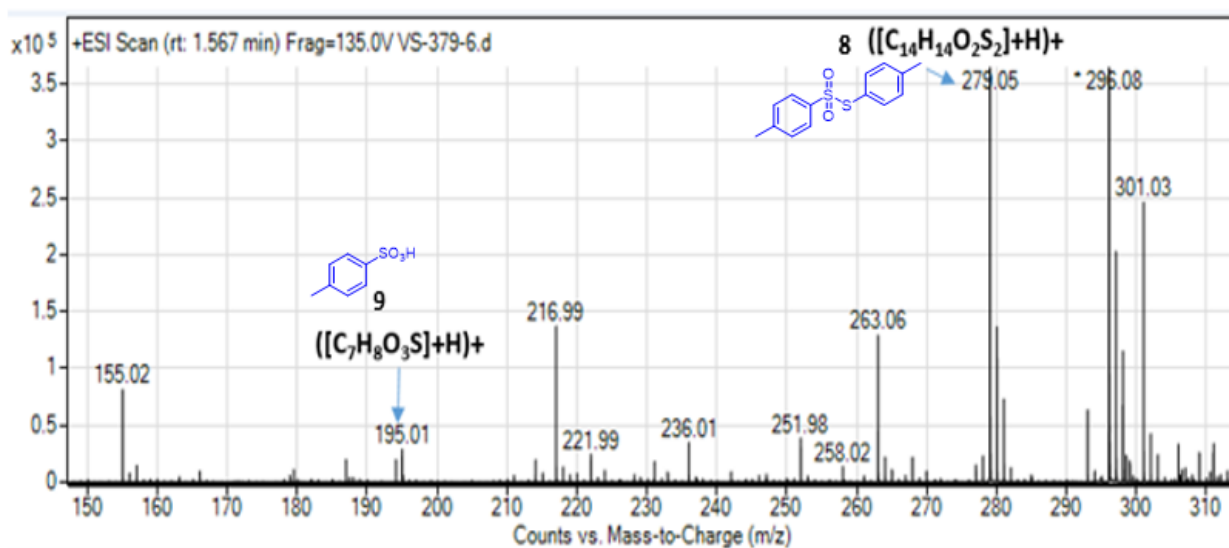

Fig. S7 Mass spectra of reaction mixture (step 2)



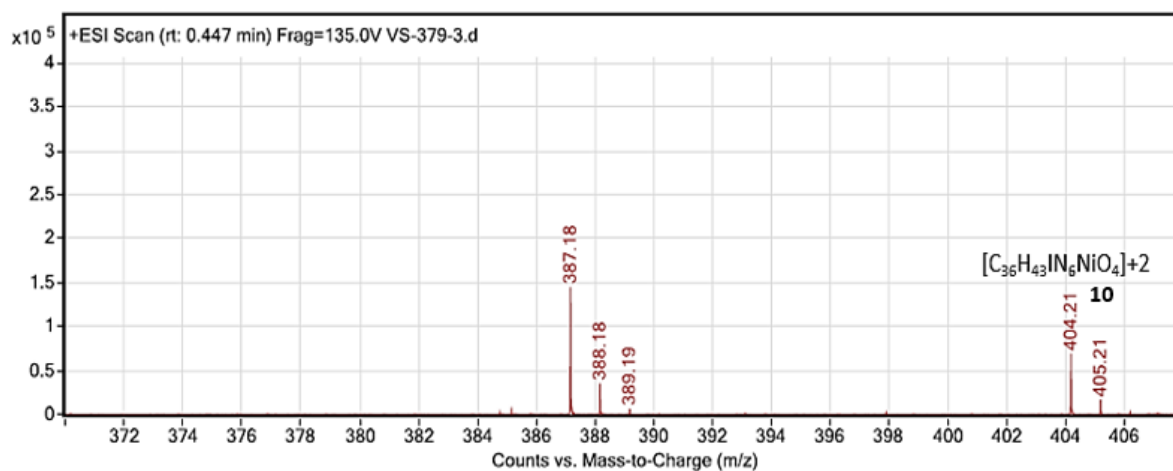

Fig. S8 Mass spectra of species 10

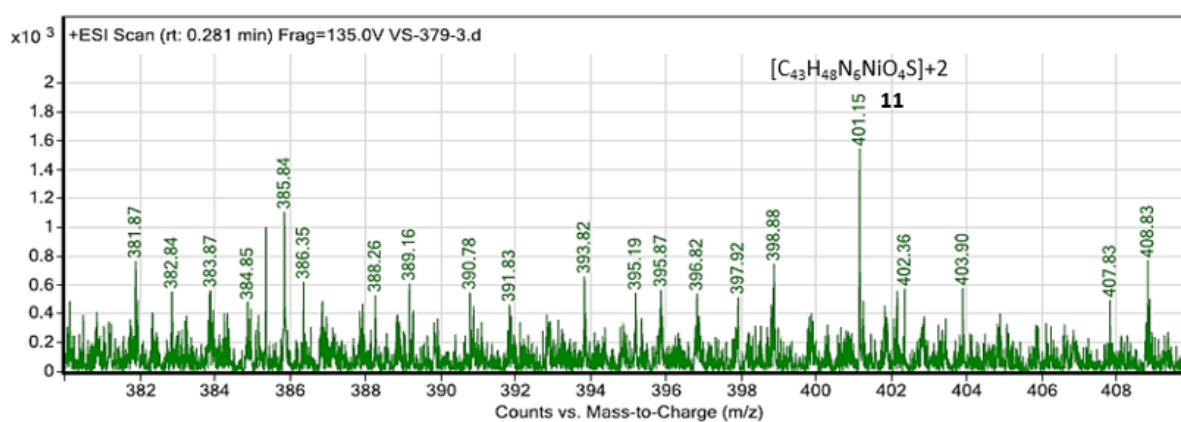

Fig. S9 Mass spectra of species 11

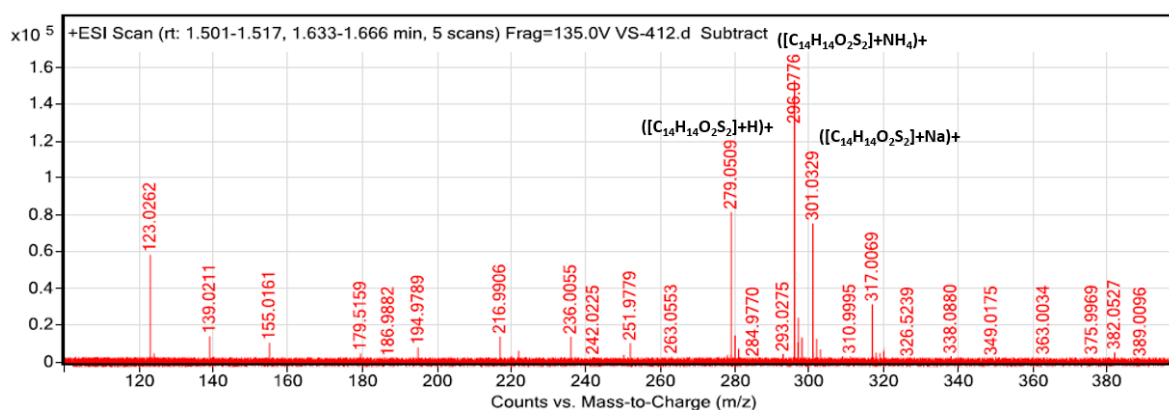

Fig. S10 HRMS of 8

## 7. References

1. N. Singh, R. Singh, D. S. Raghuvanshi and K. N. Singh, *Org. Lett.*, 2013, **15**, 5874-5877.
2. T.-T. Wang, F.-L. Yang and S.-K. Tian, *Adv. Synth. Catal.*, 2015, **357**, 928-932.
3. V. P. Reddy, K. Swapna, A. V. Kumar and K. R. Rao, *J. Org. Chem.*, 2009, **74**, 3189-3191.
4. W.-Y. Wu, J.-C. Wang and F.-Y. Tsai, *Green chem.*, 2009, **11**, 326-329.
5. Y. Yang, S. Zhang, L. Tang, Y. Hu, Z. Zha and Z. Wang, *Green chem.*, 2016, **18**, 2609-2613.

## 8. $^1\text{H}$ NMR and $^{13}\text{C}$ NMR spectra of C-S cross coupling products

1.

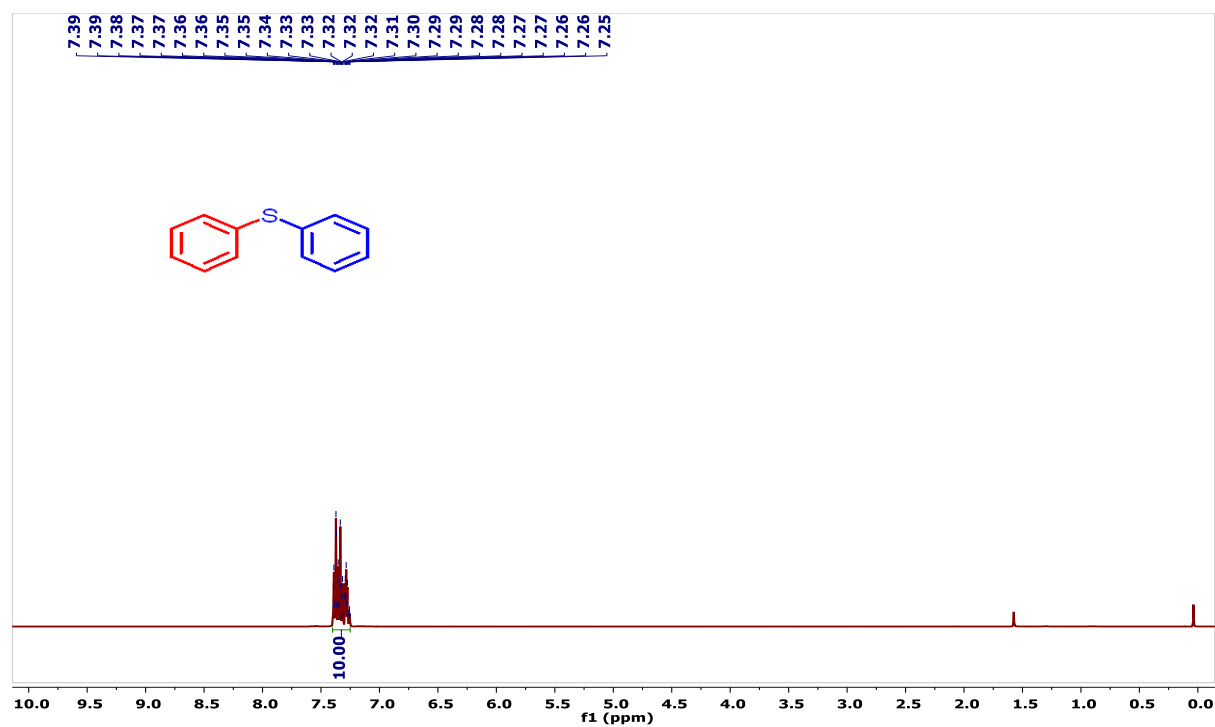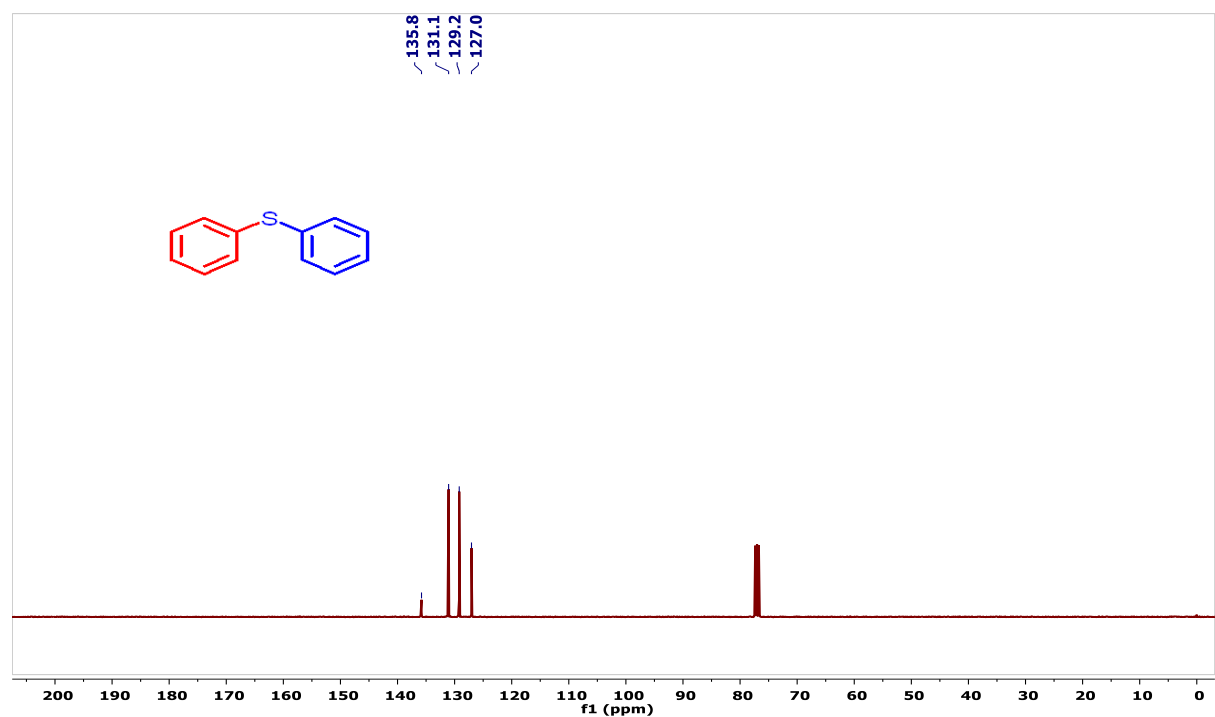

2.

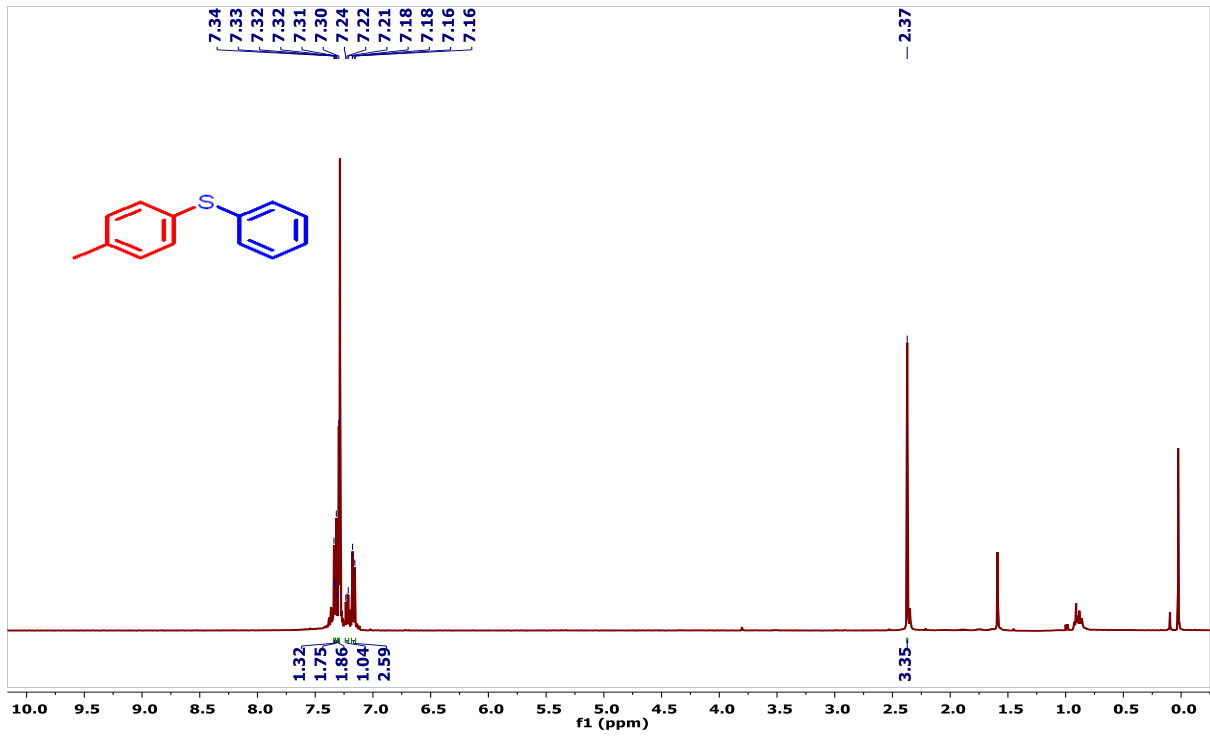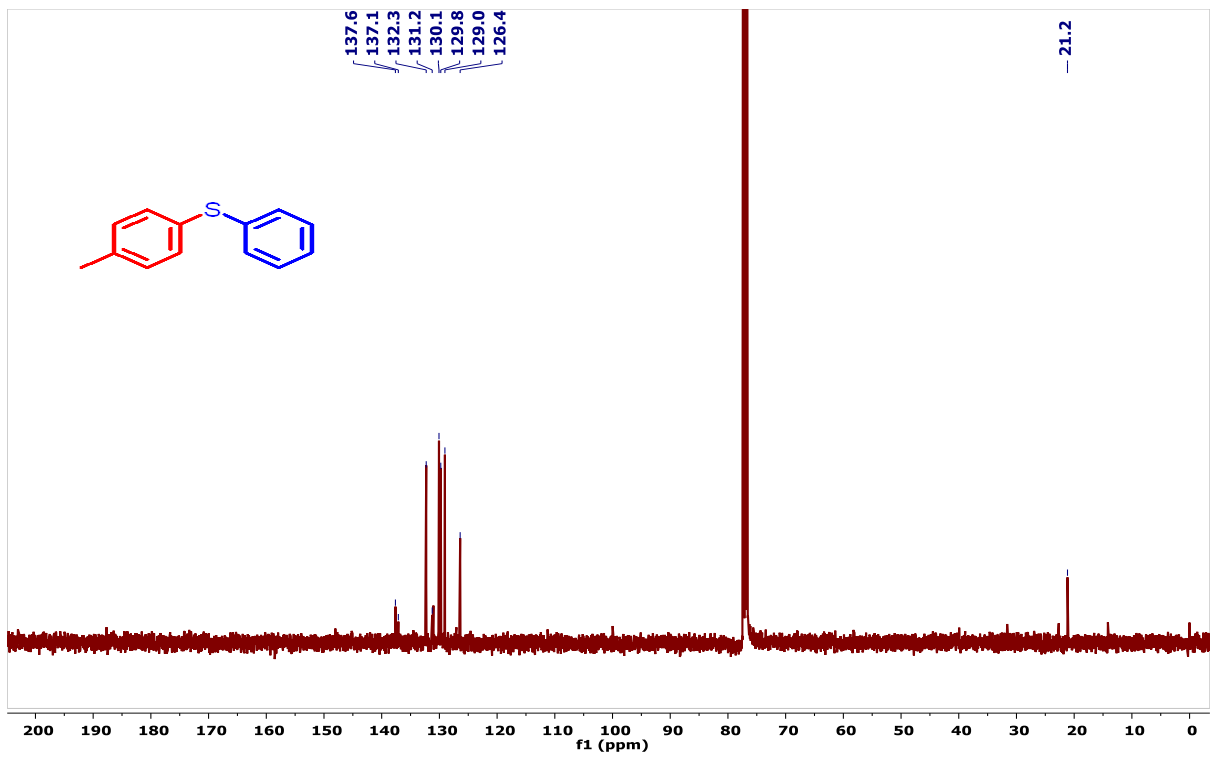

3.

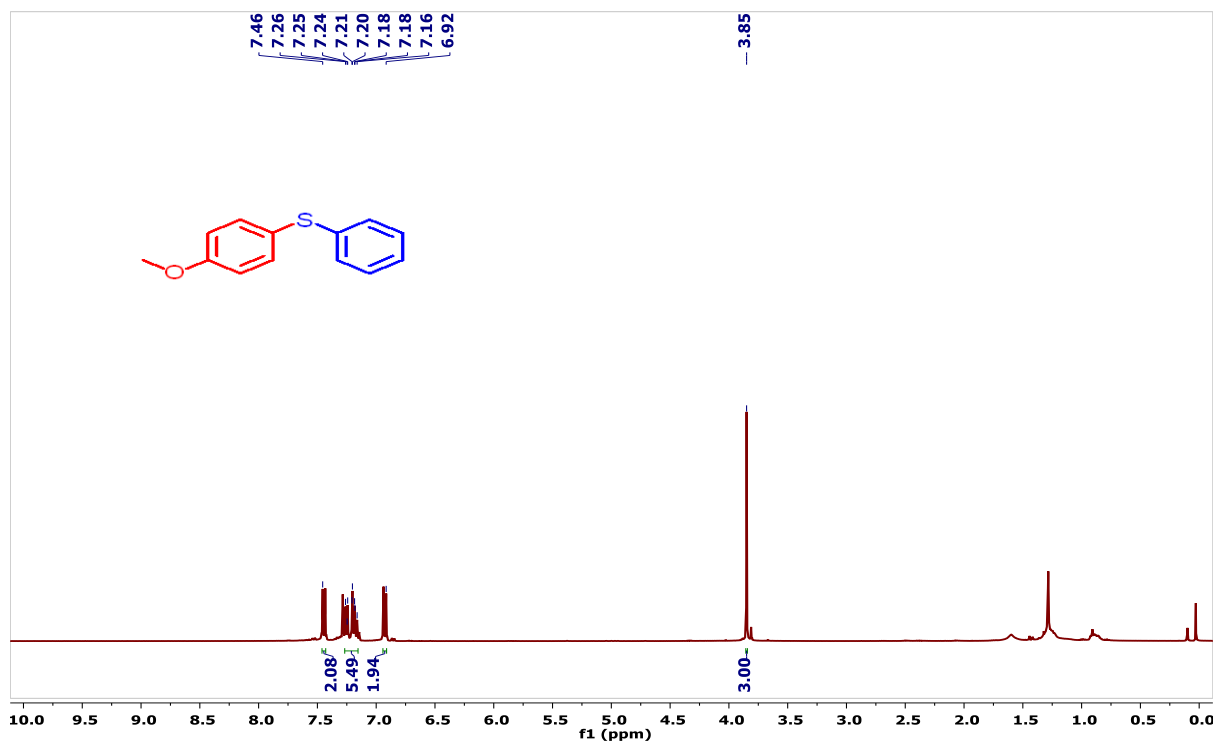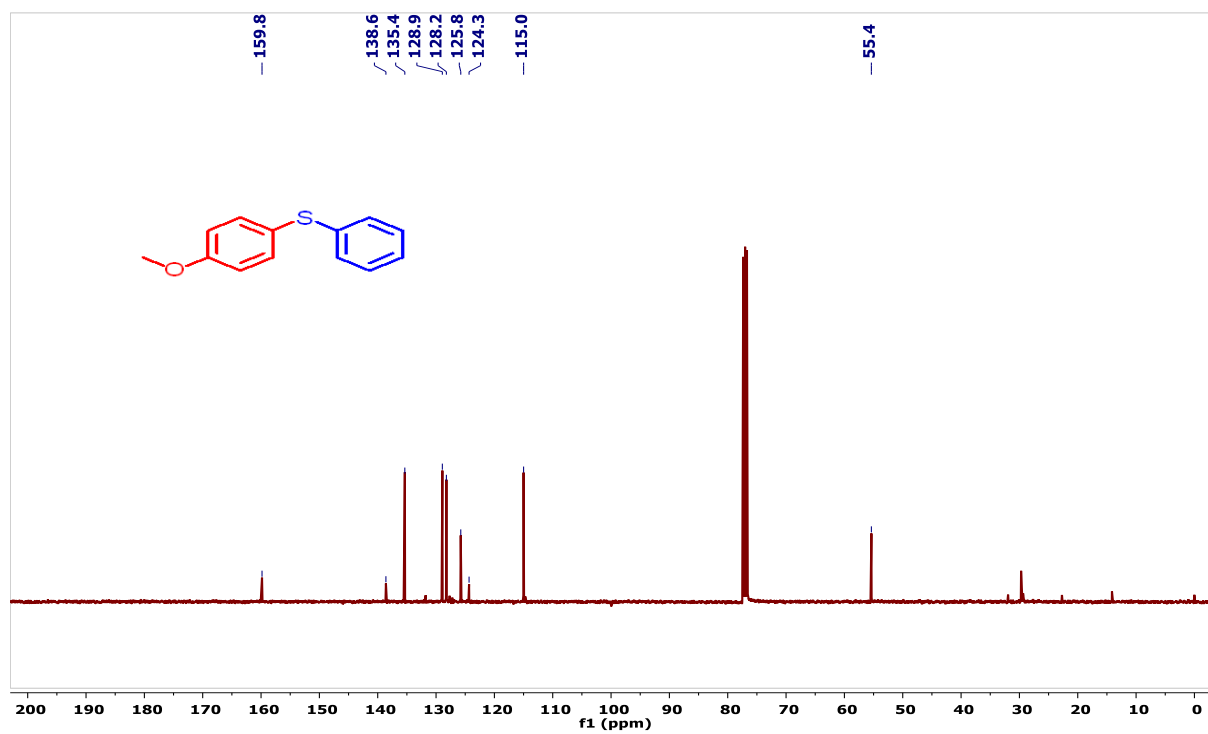

4.

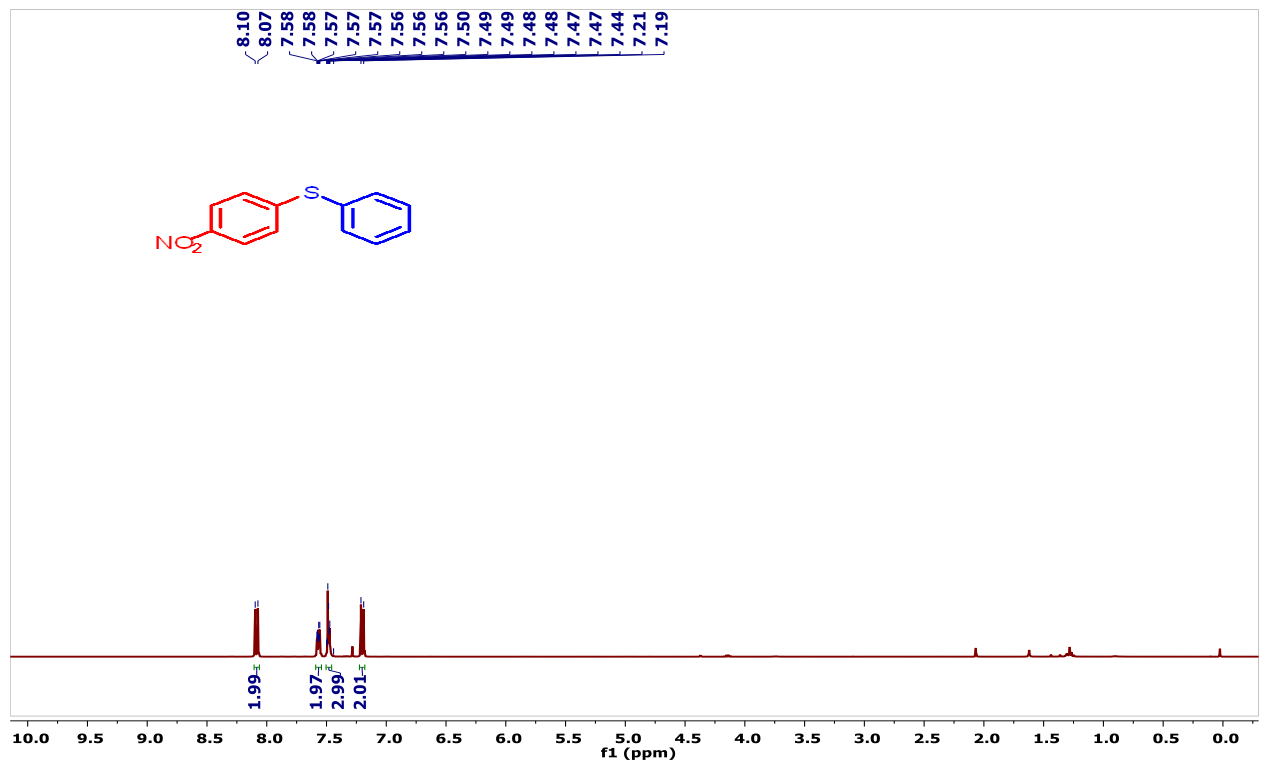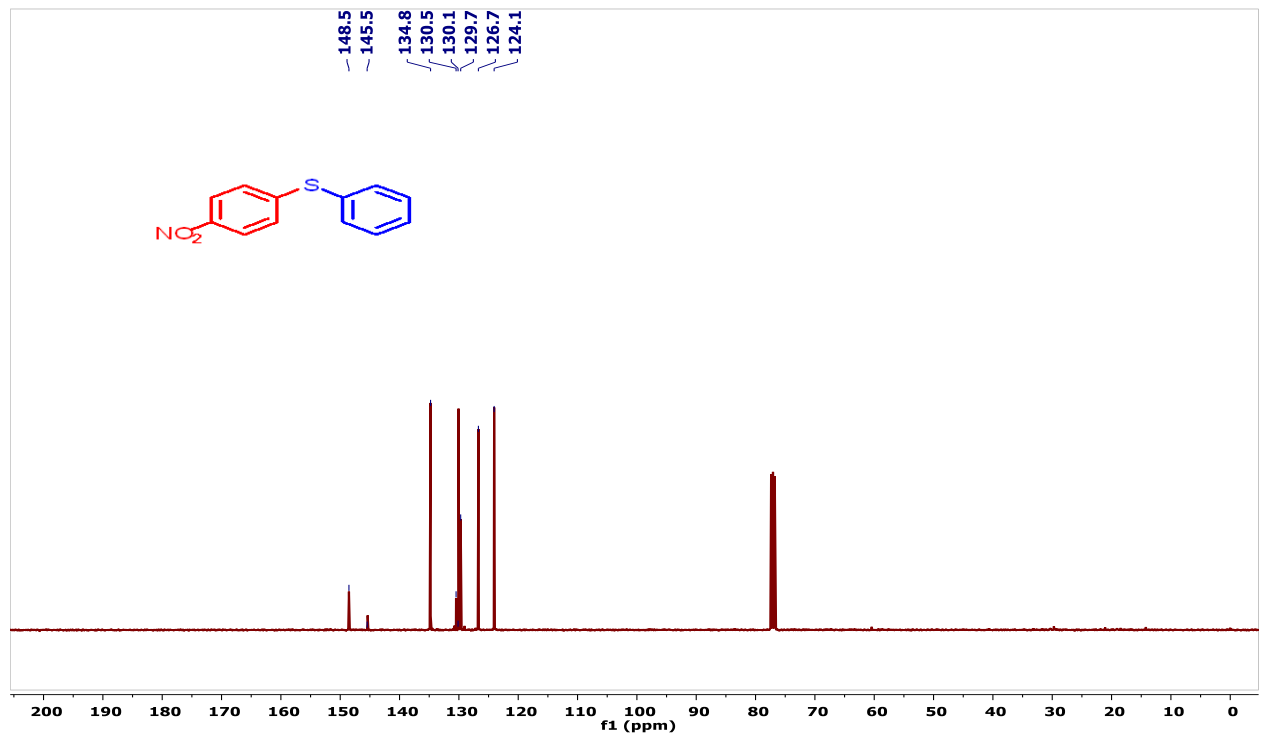

5.

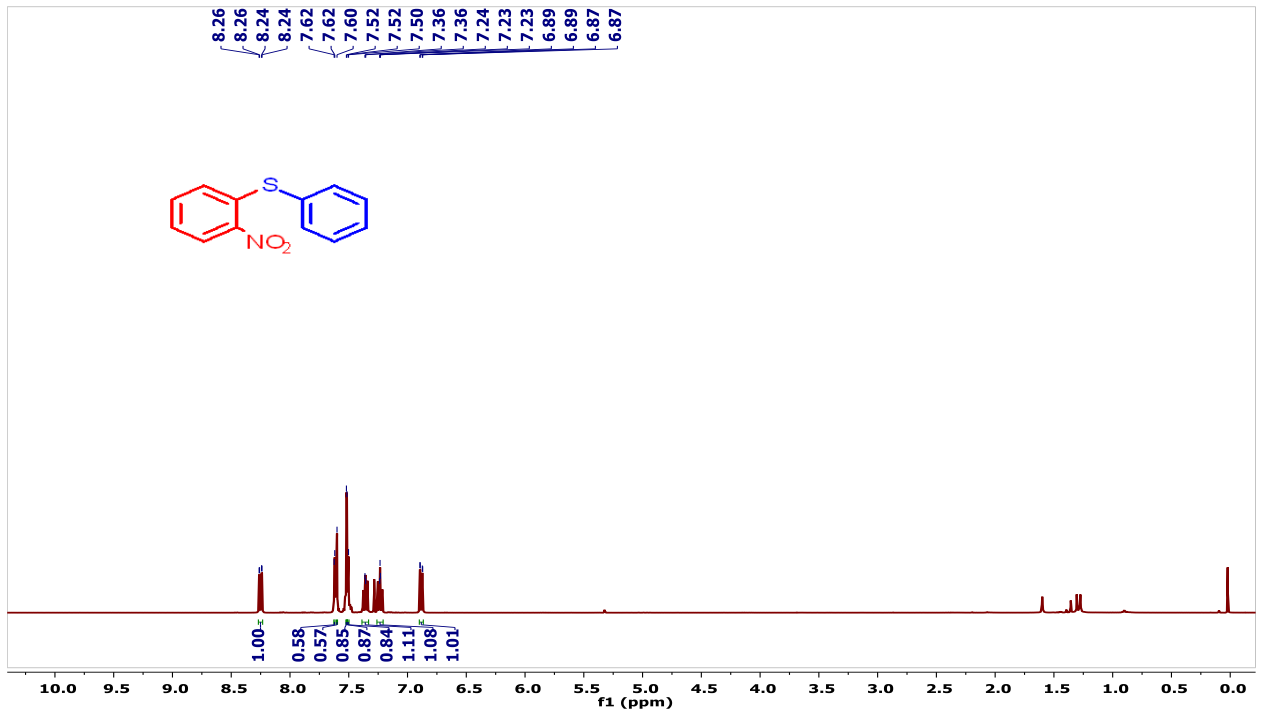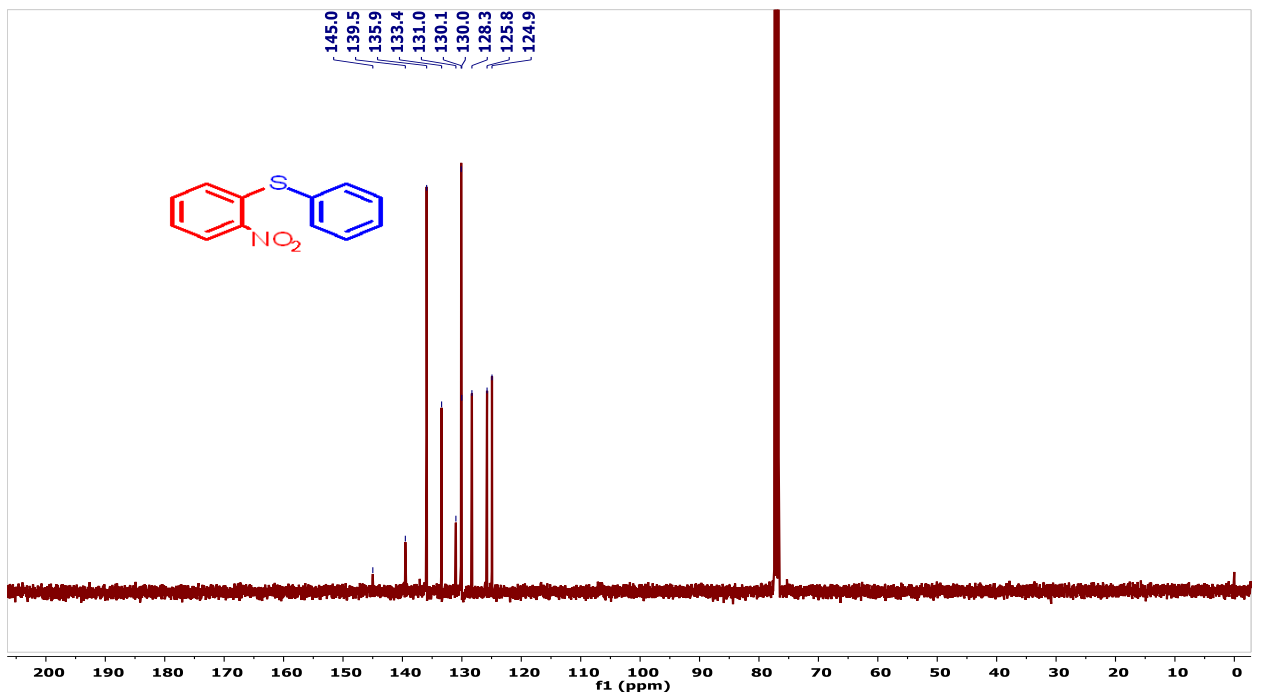

6.

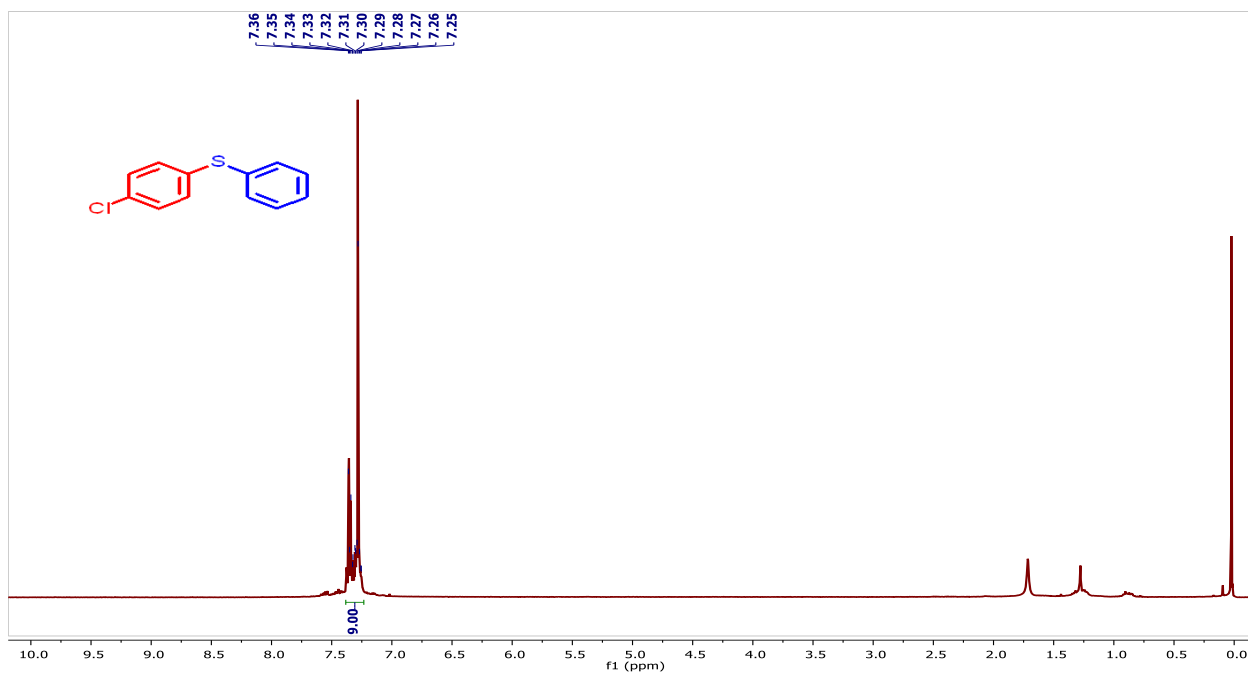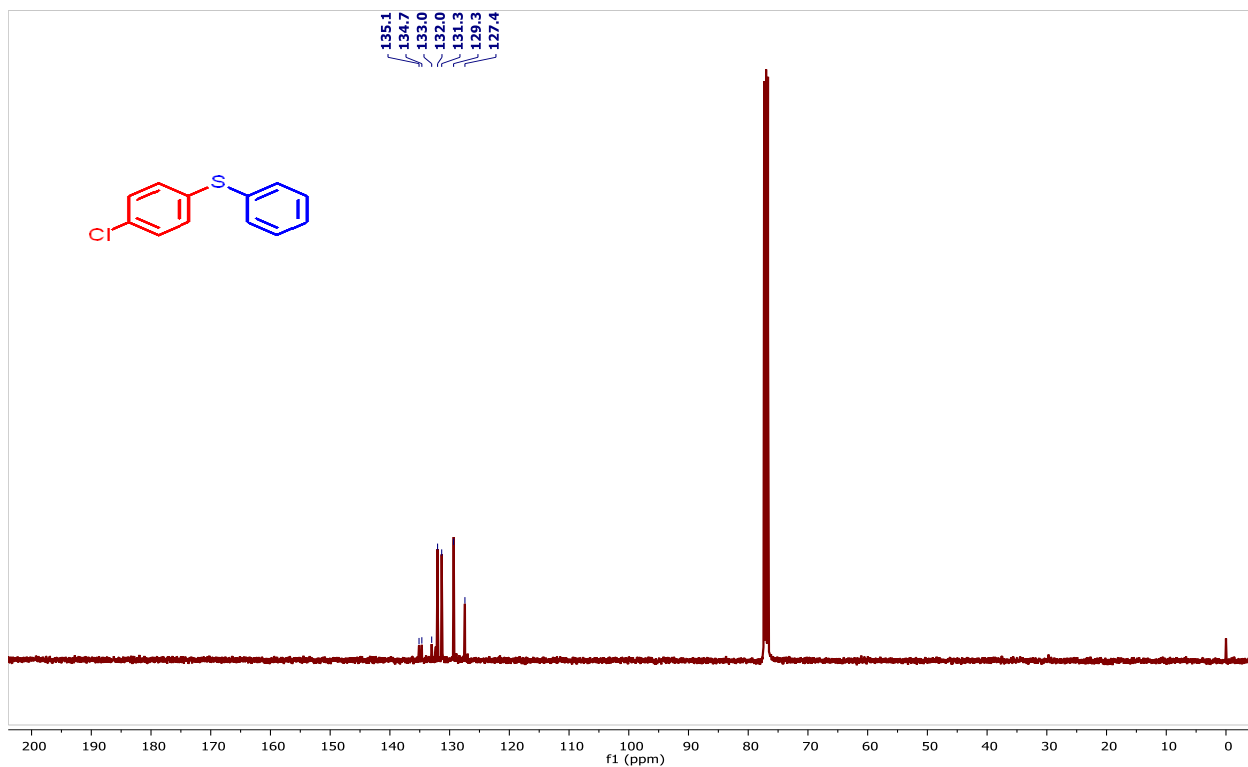

7.

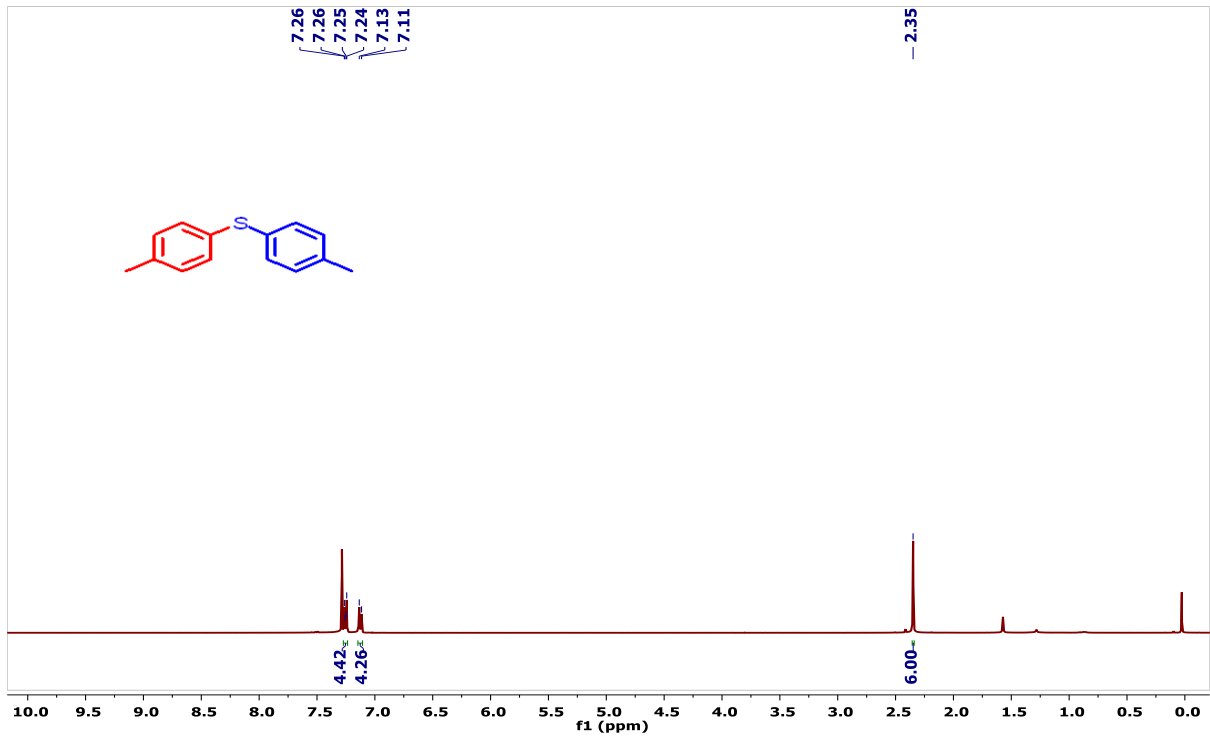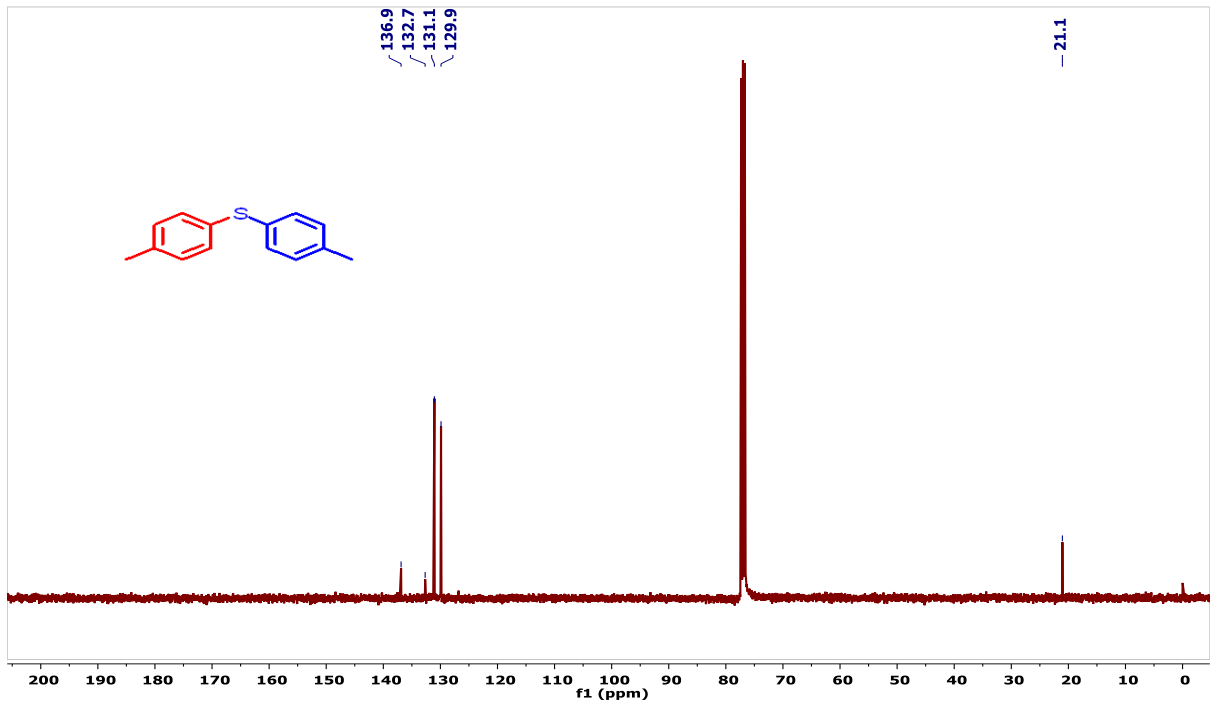



8.

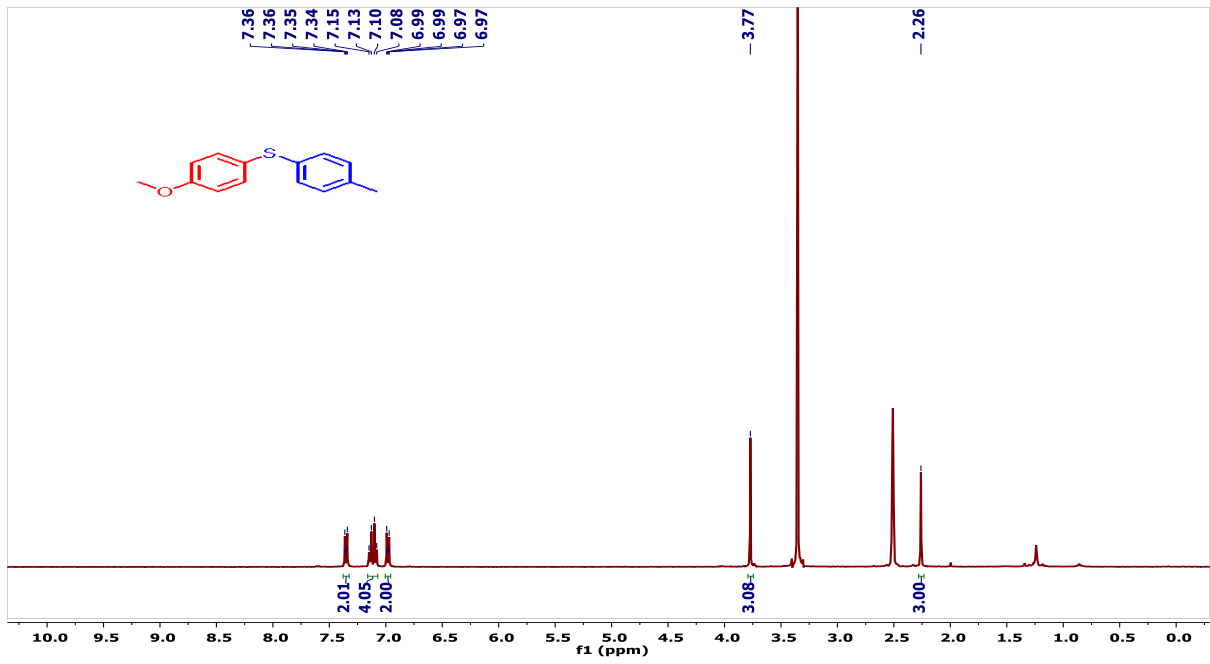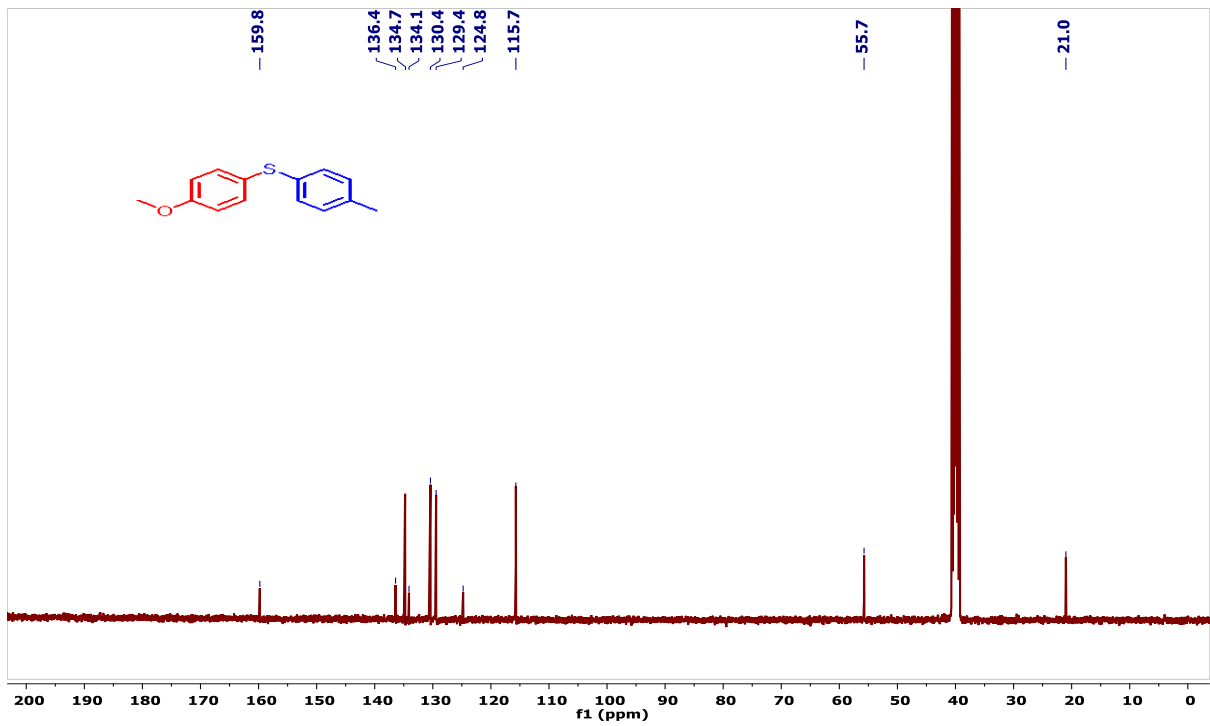

9.

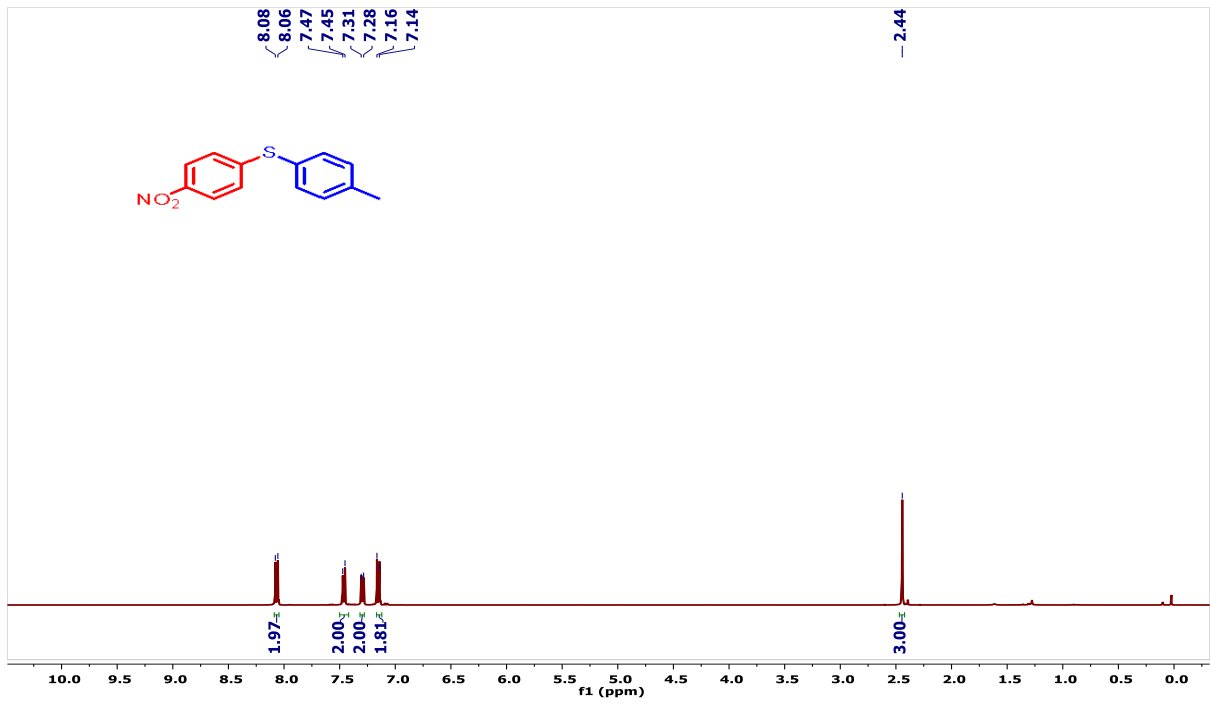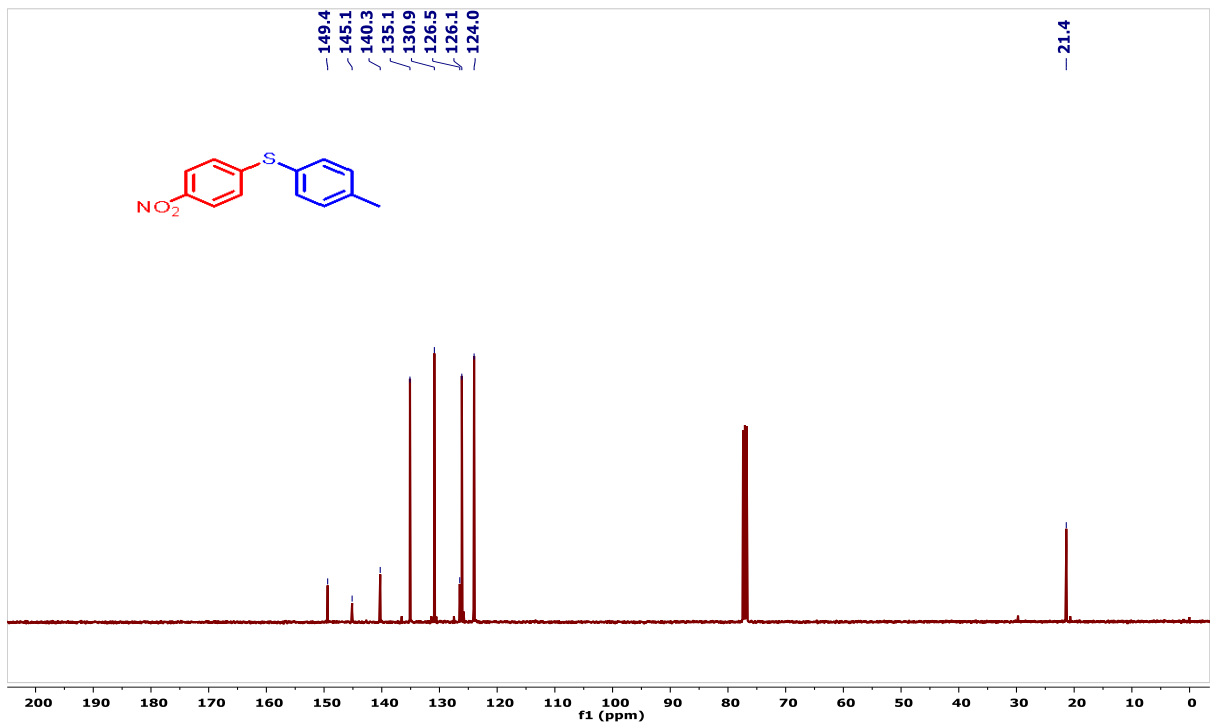

10.

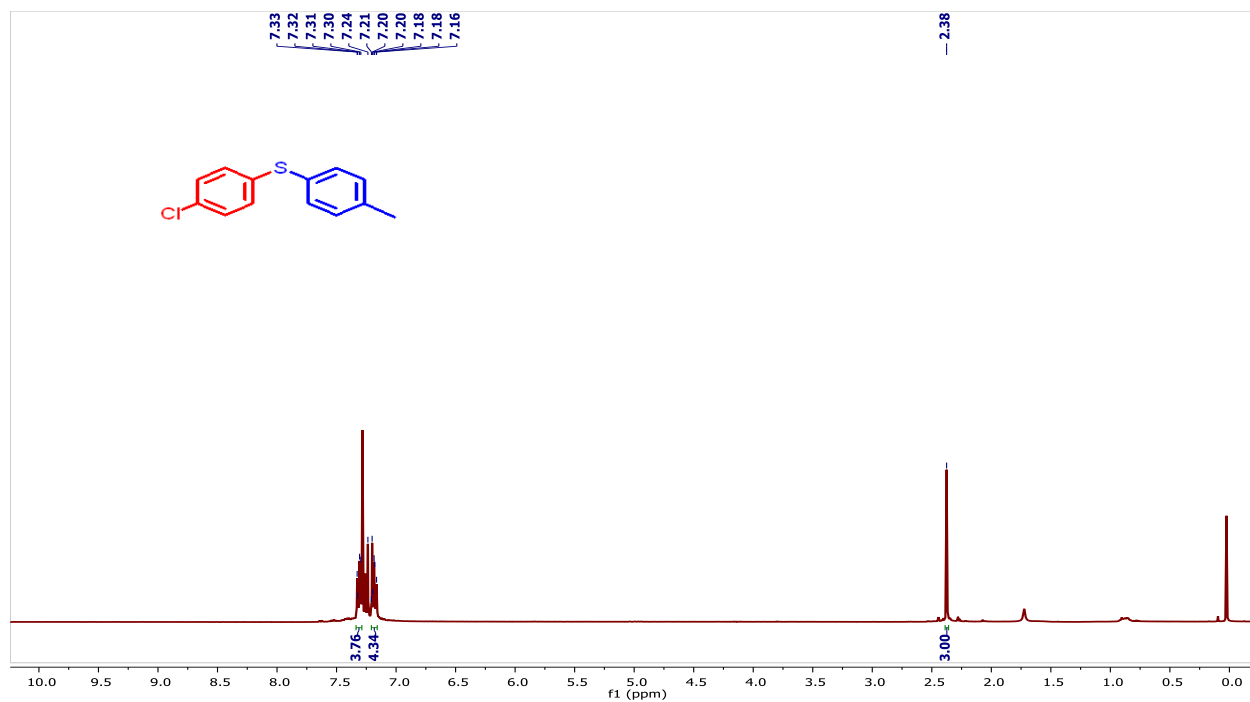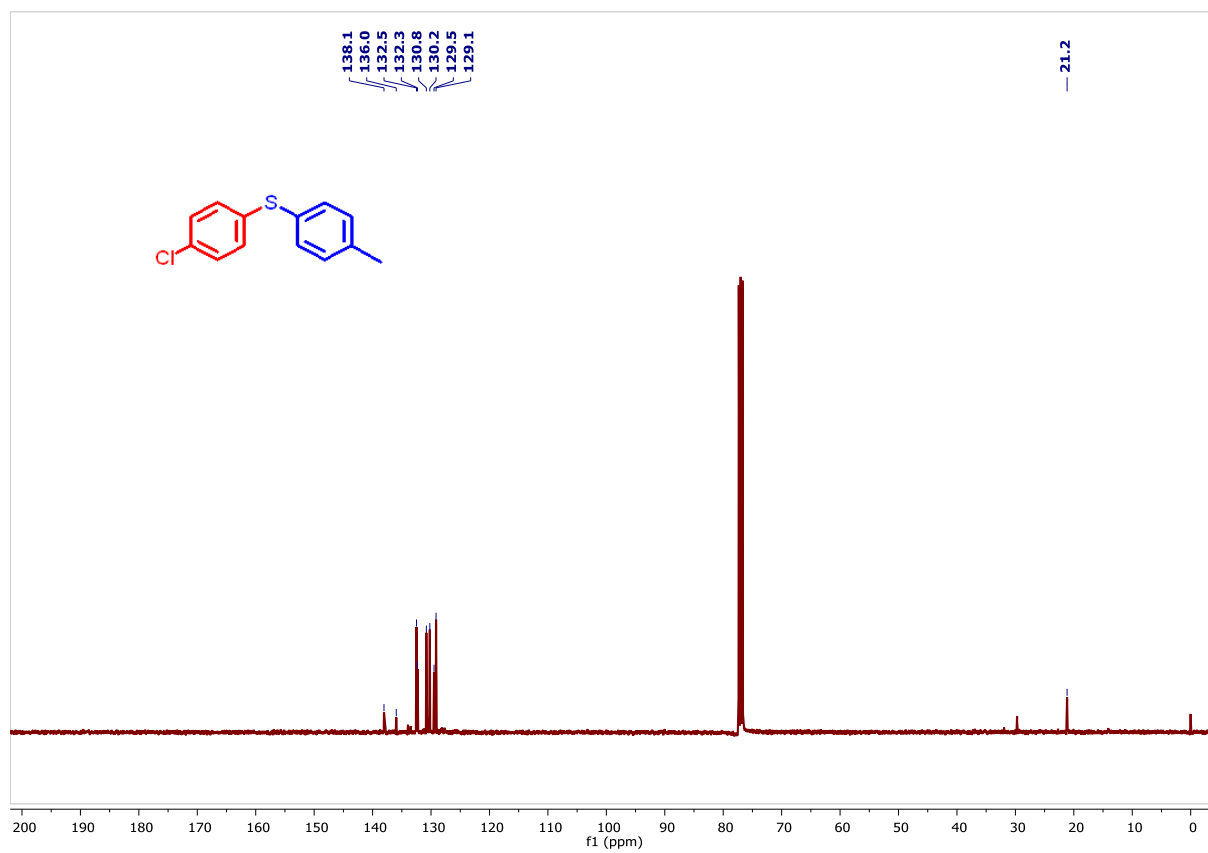

11.

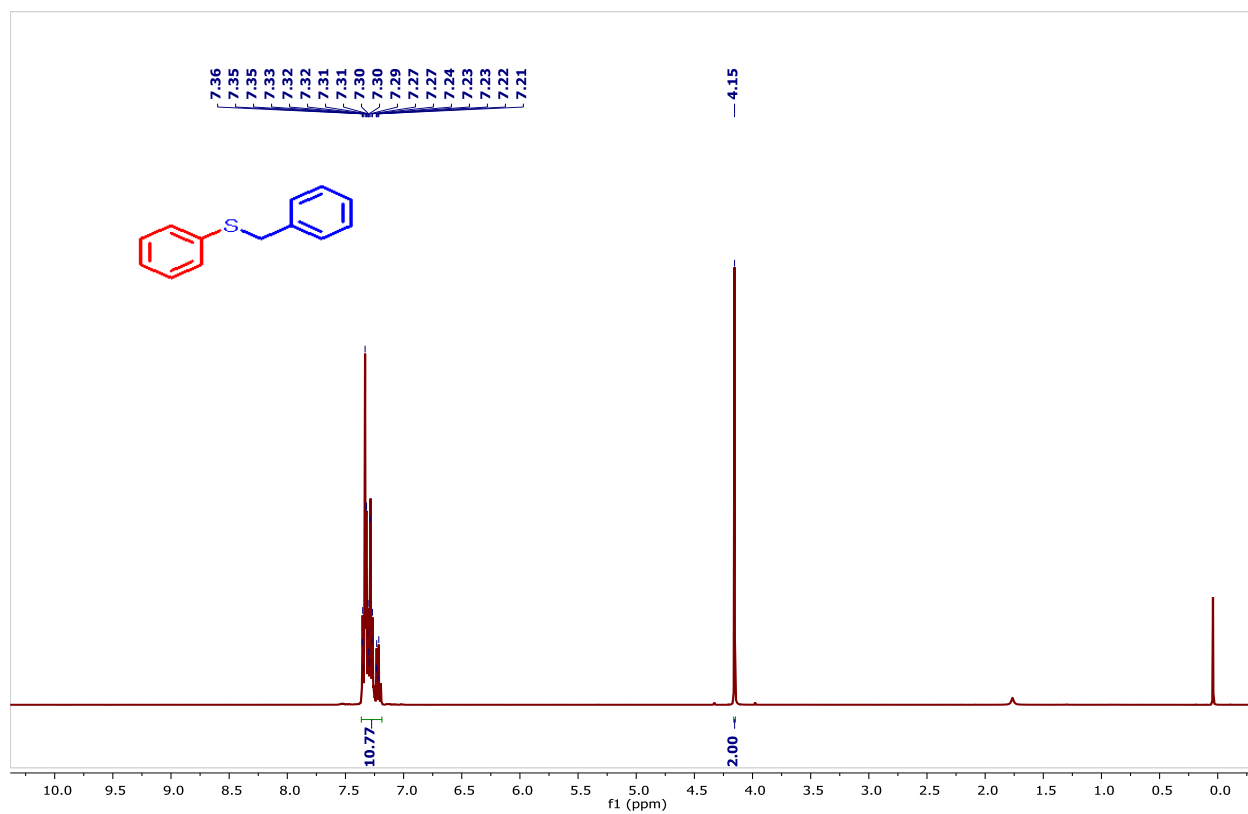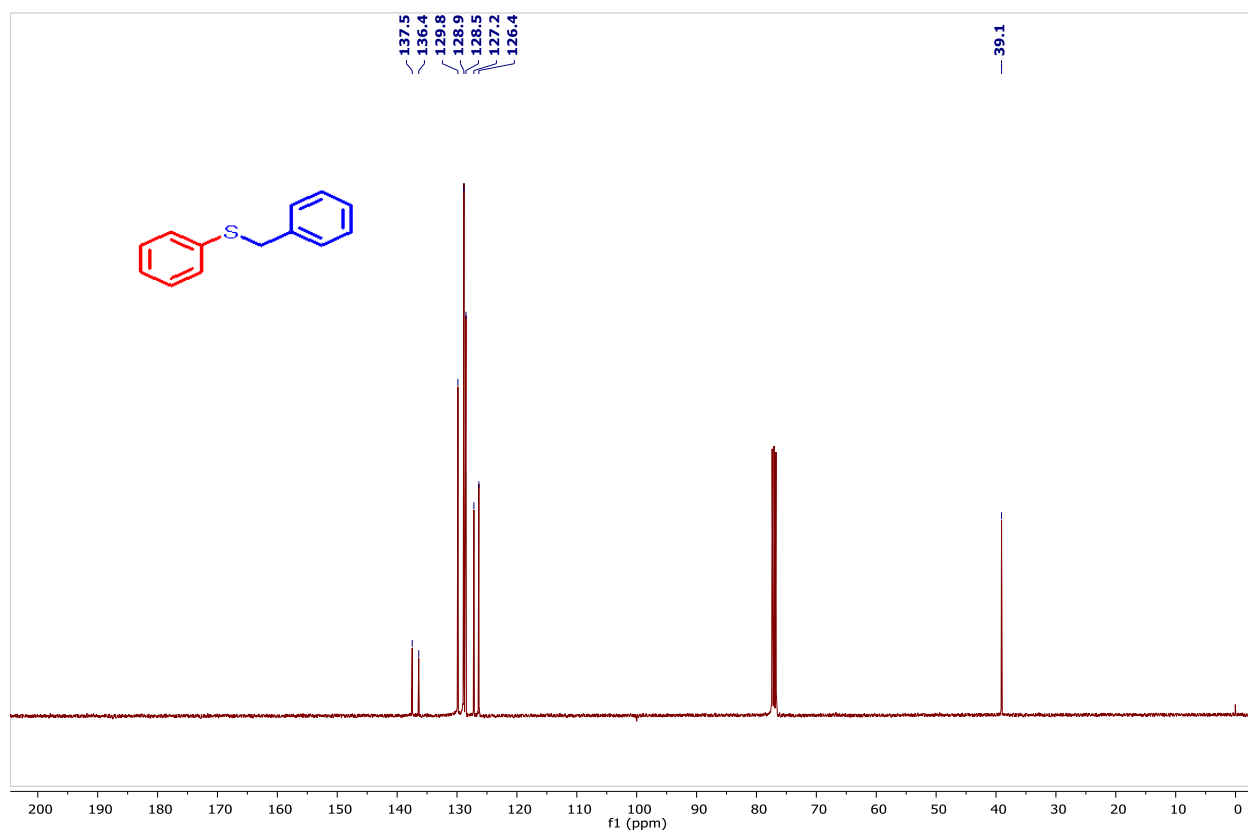

12.

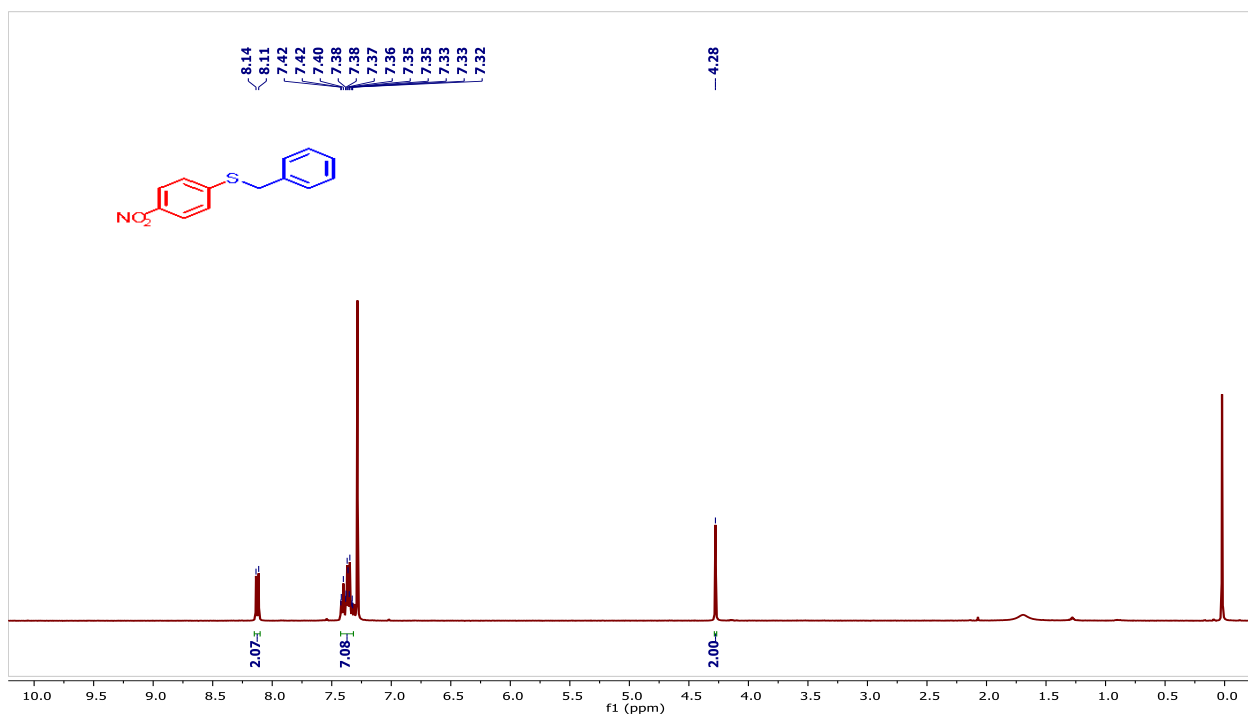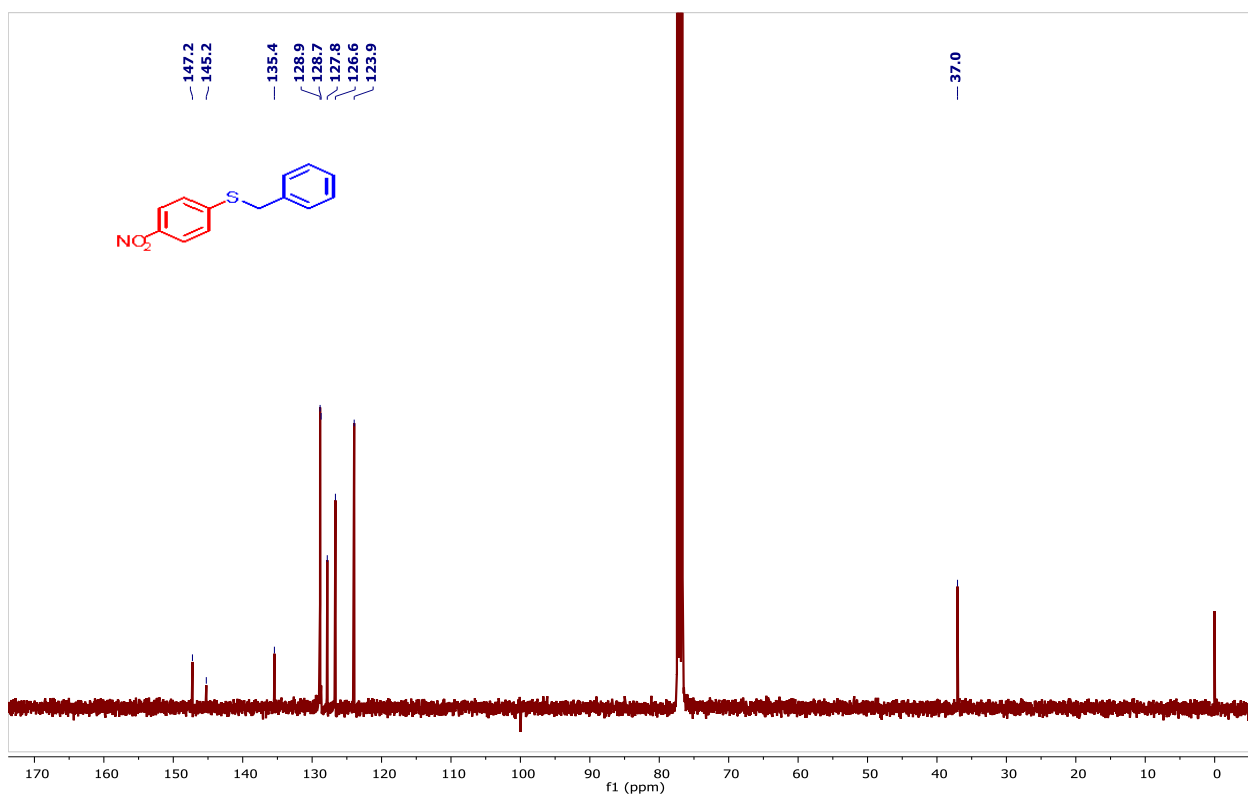

13.

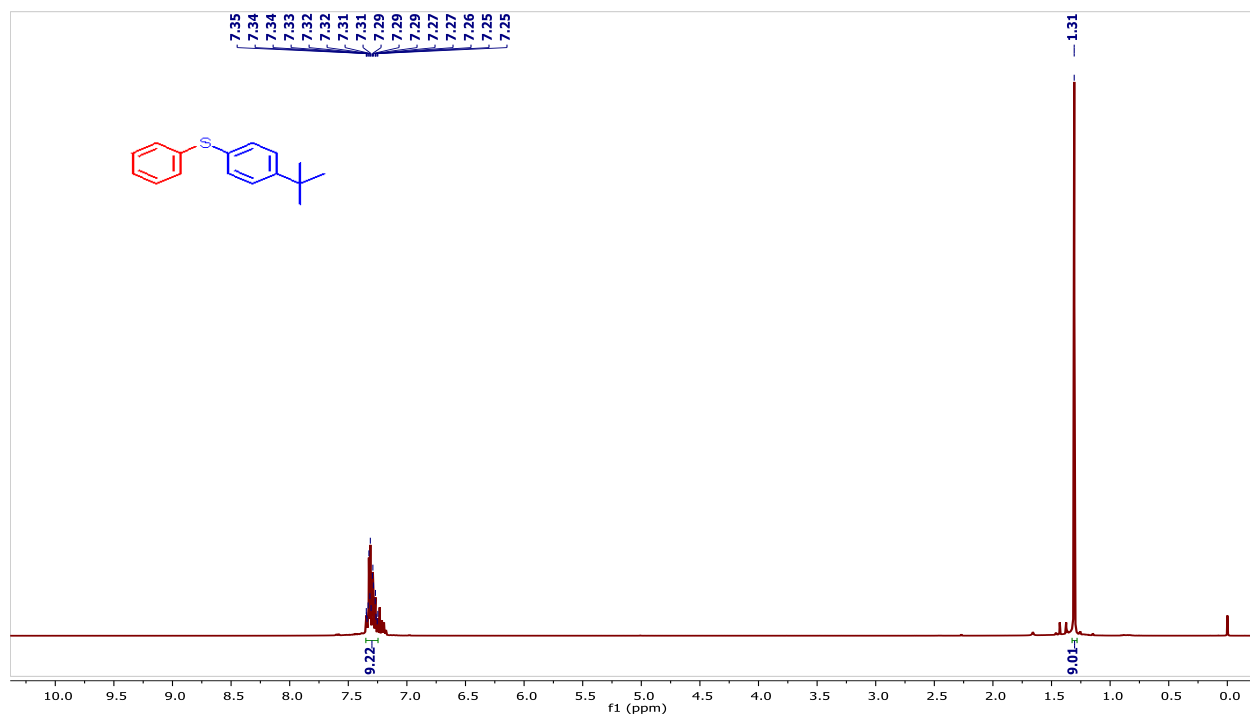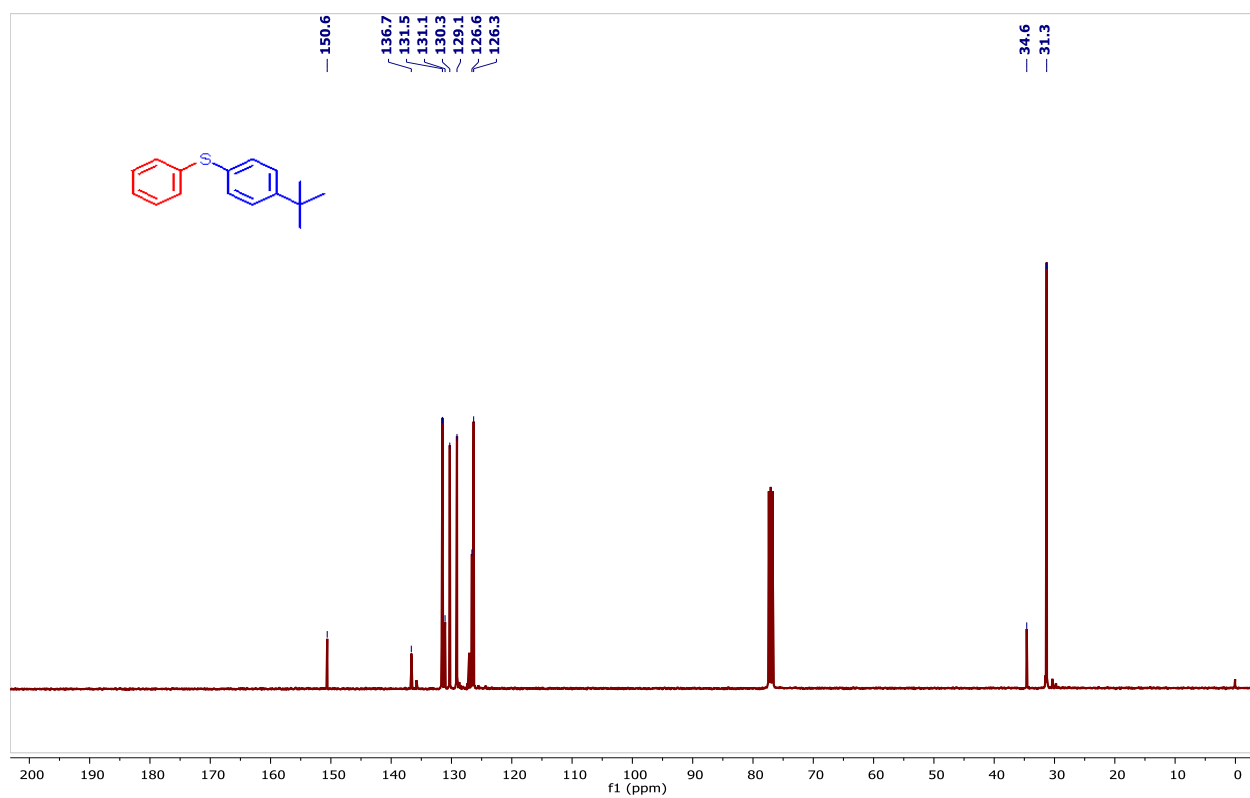

14.

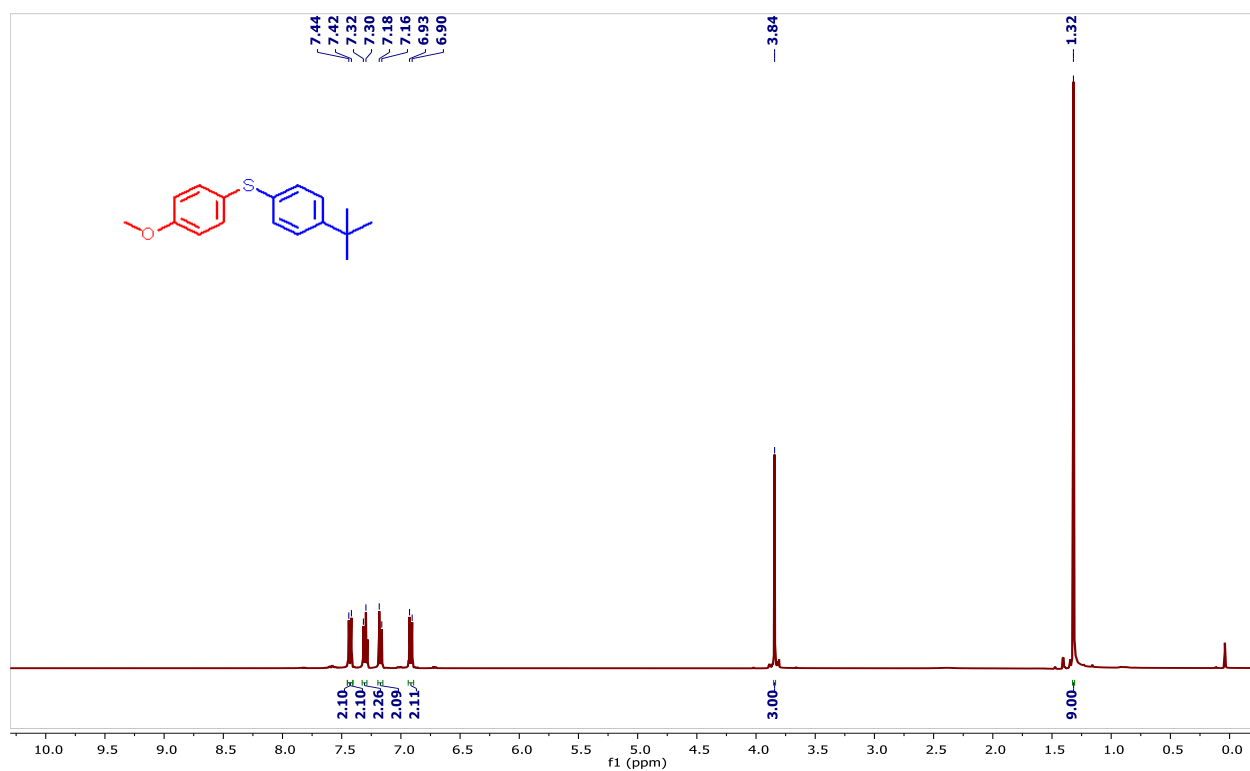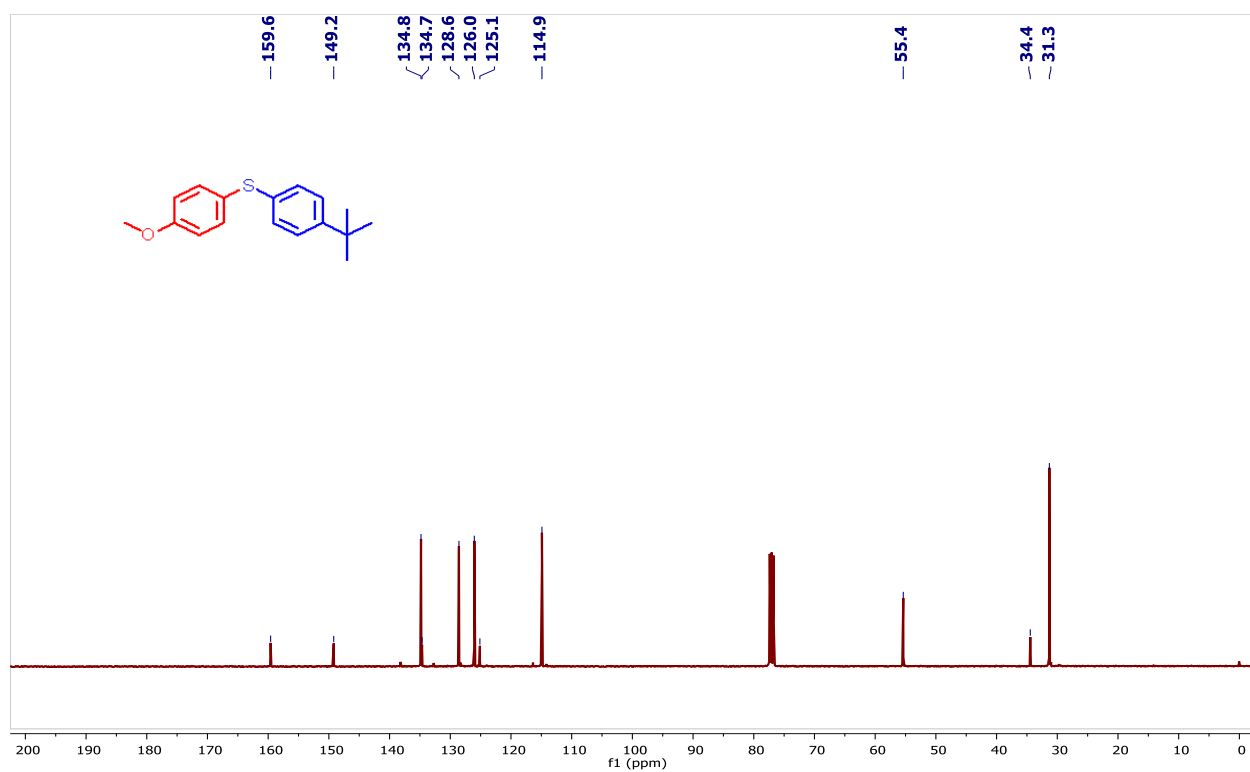

15.

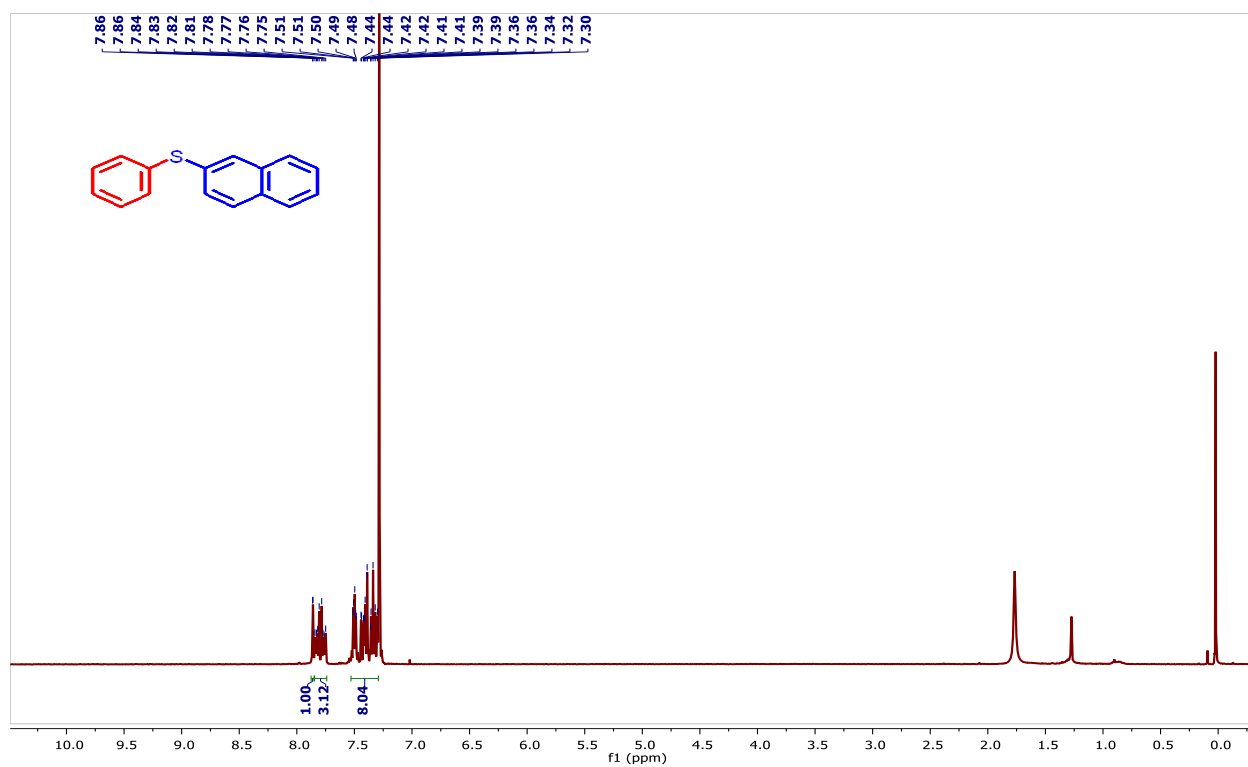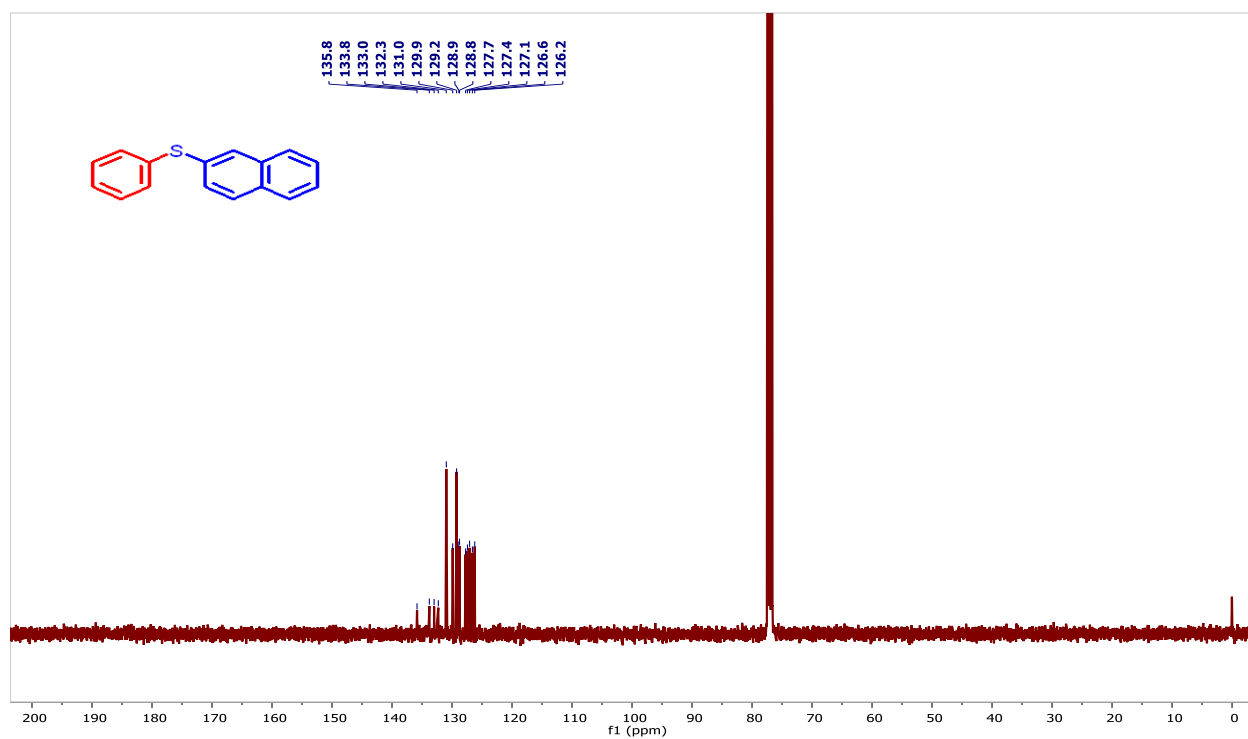



16.

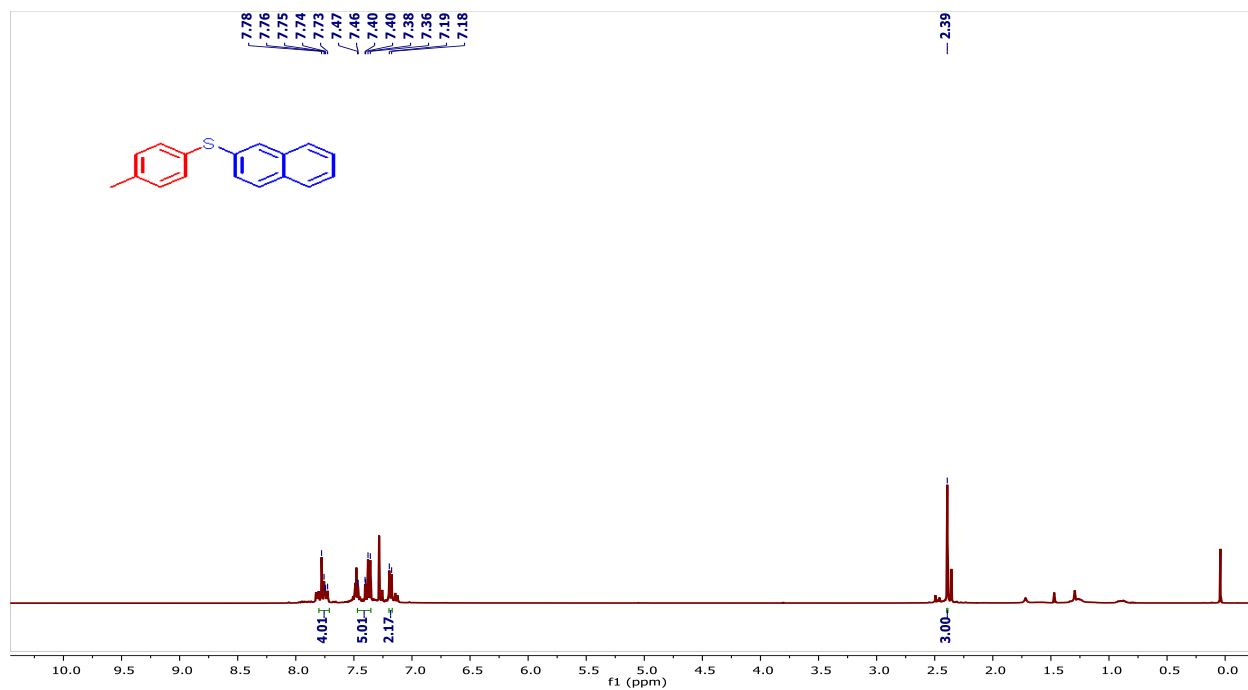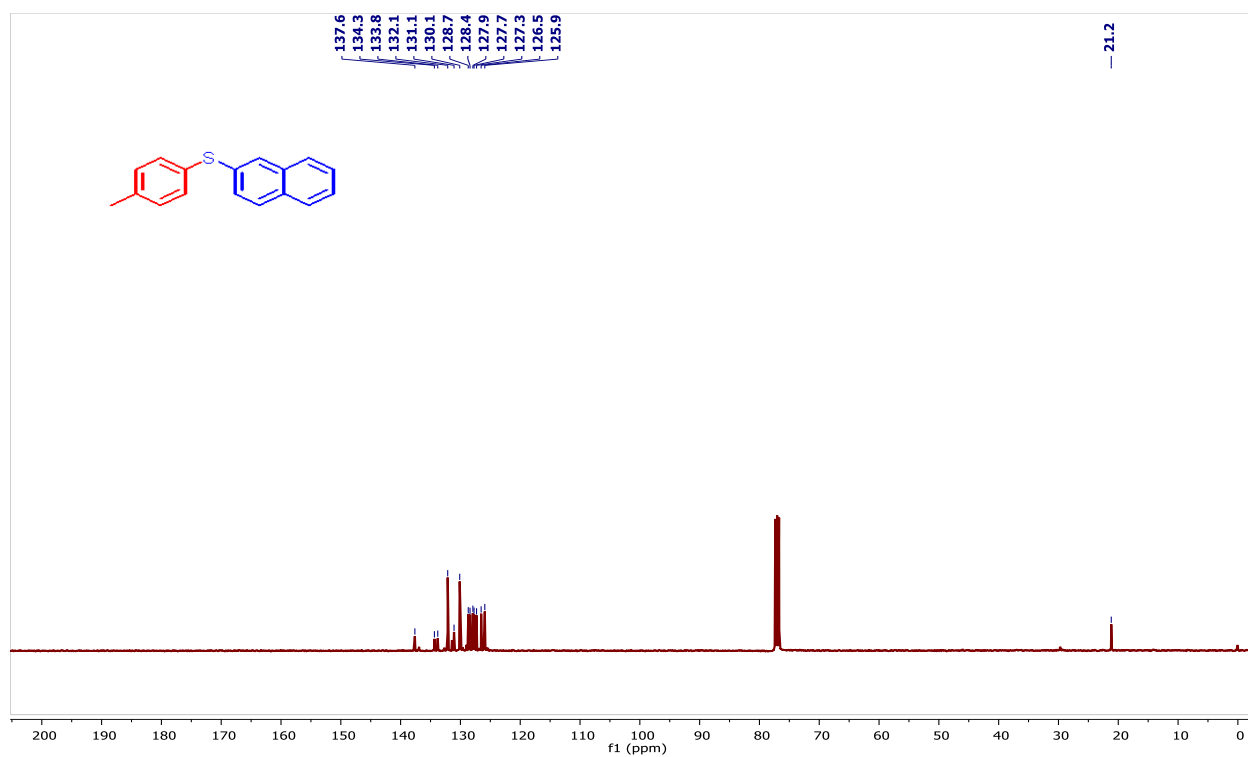

17.

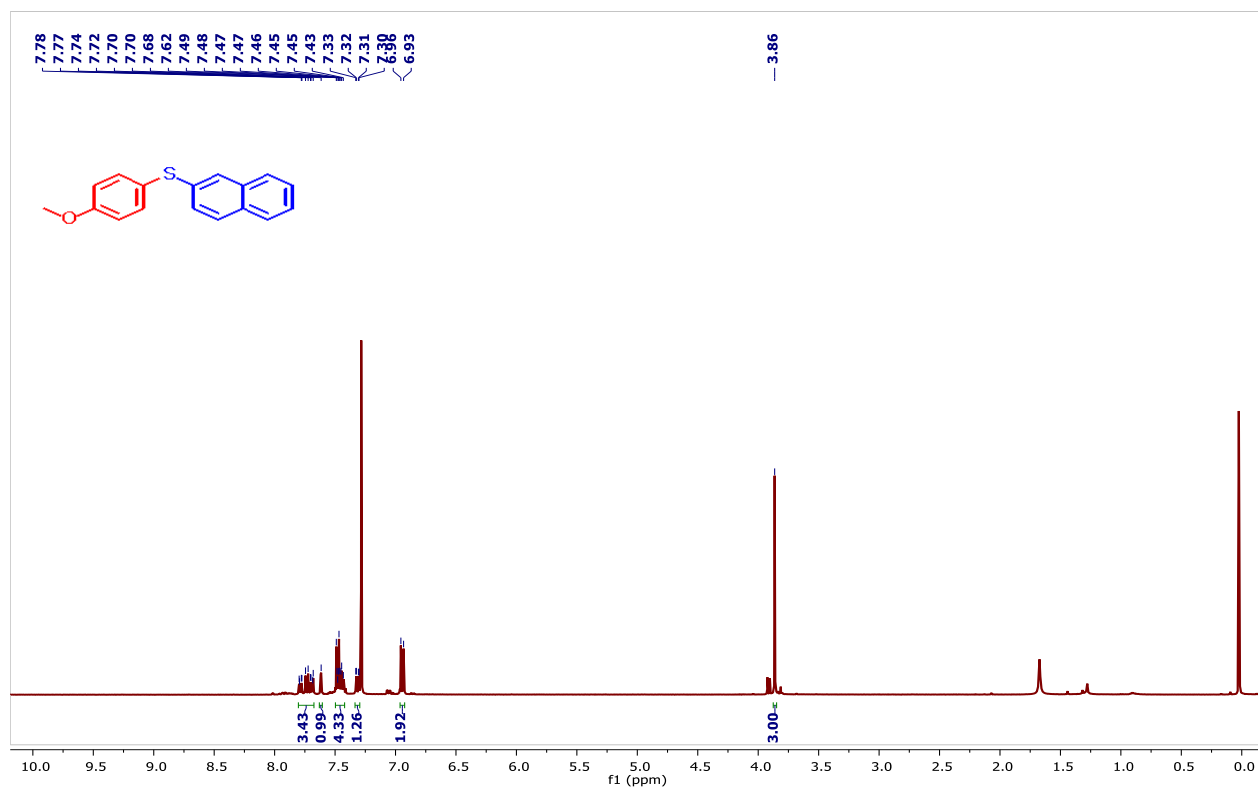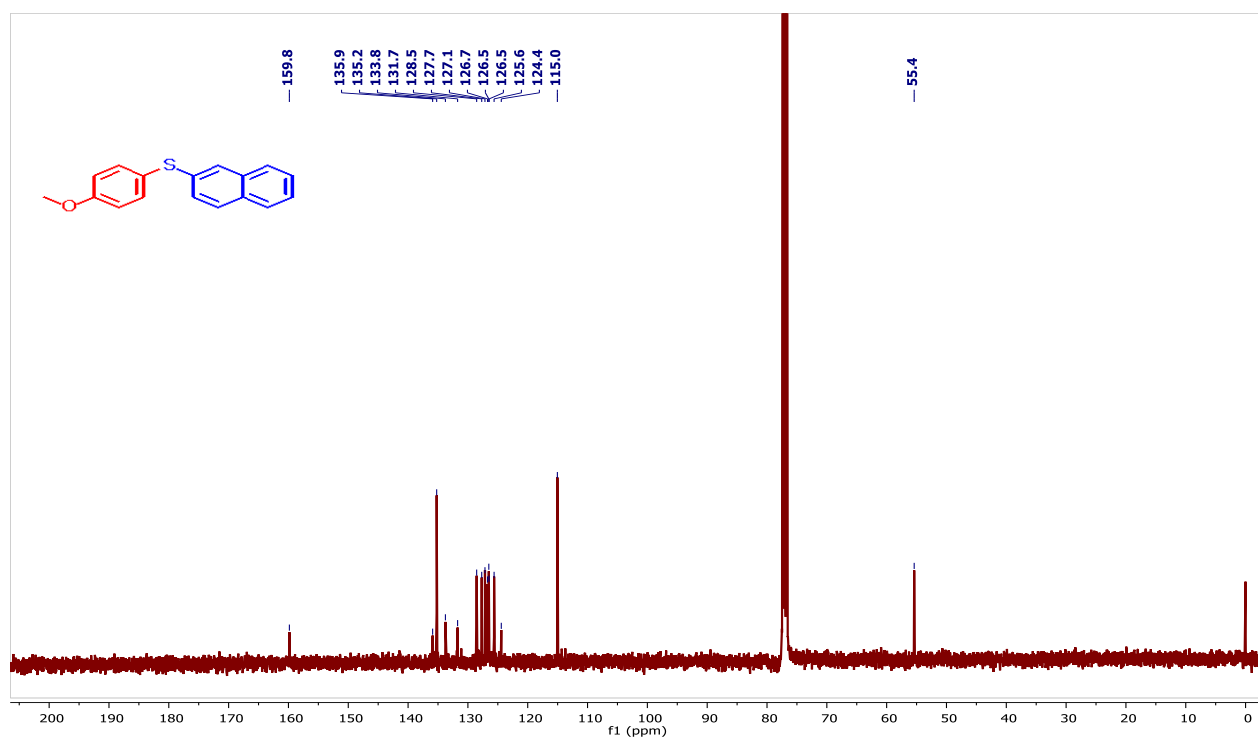

18.

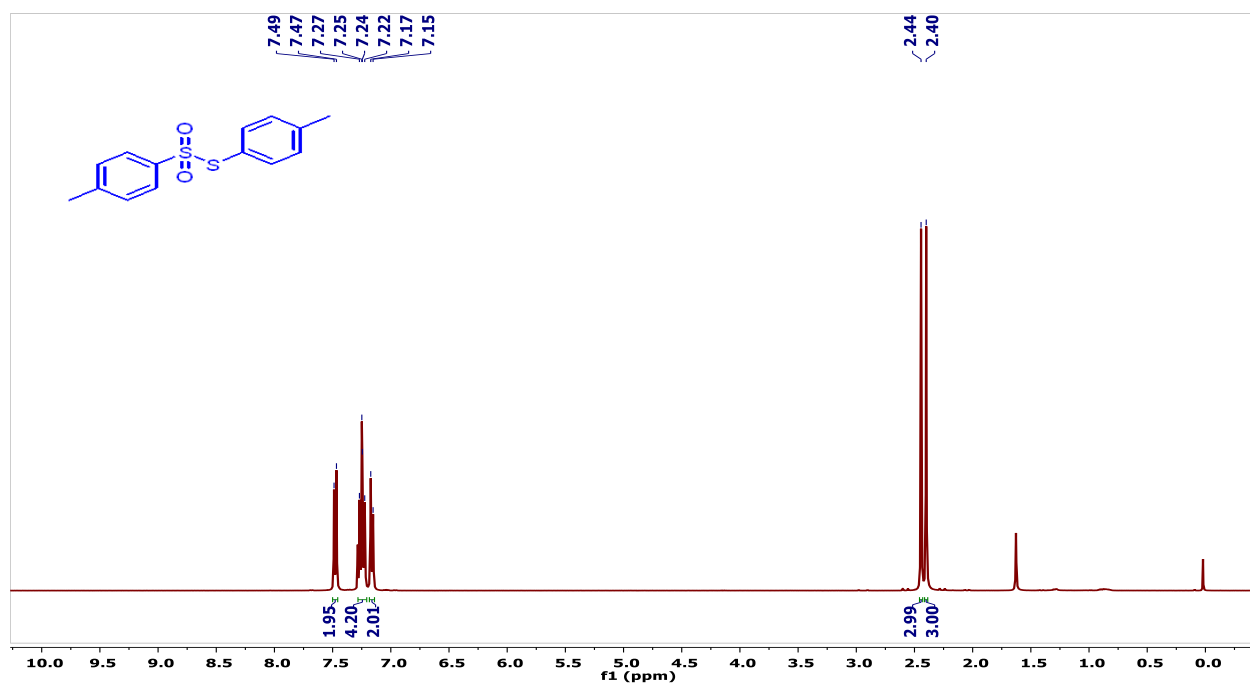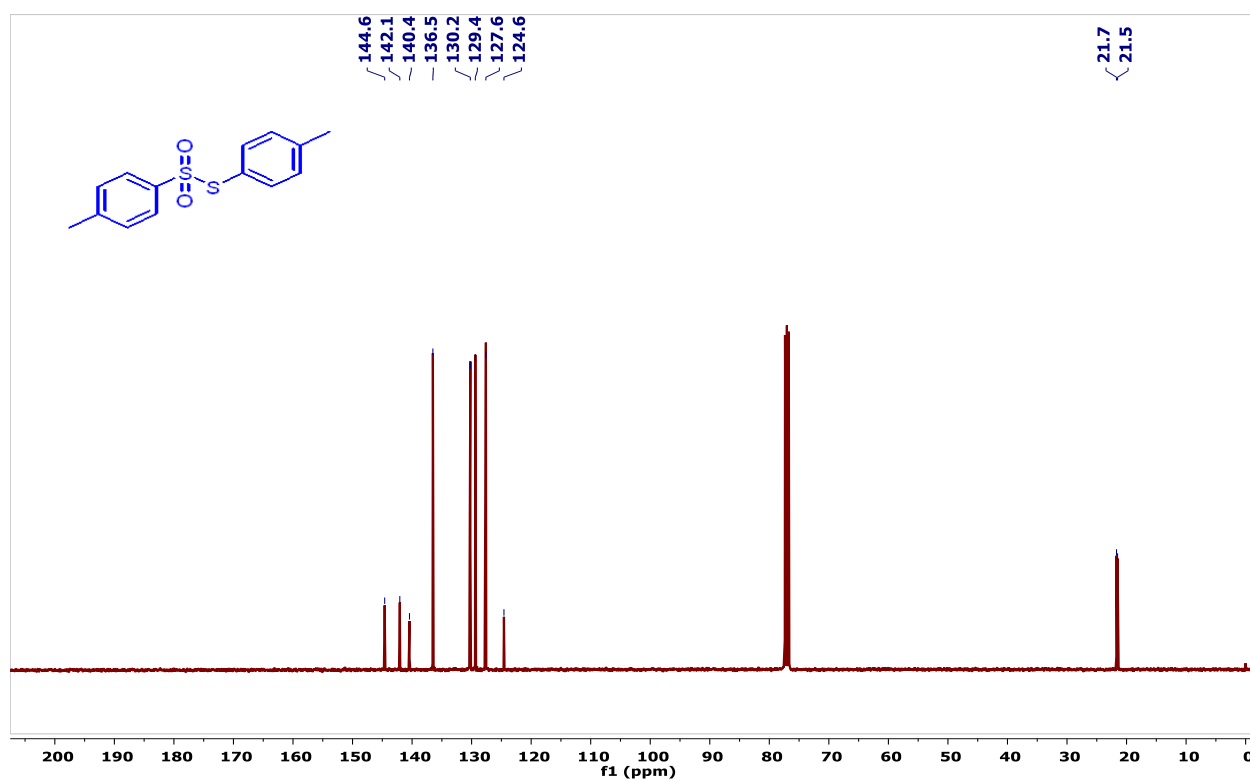

Supplement: c8nj00904j1.pdf [file c8nj00904j1.pdf]
